# Supplementary figures and images for: SepFree NMF: A Toolbox for Analyzing the Kinetics of Sequential Spectroscopic Data
Source: MDPI journal article supplement (doi:10.3390/a15090297), 2022-08-24

# NMF with PCCA+ analysis

Plot  $H$

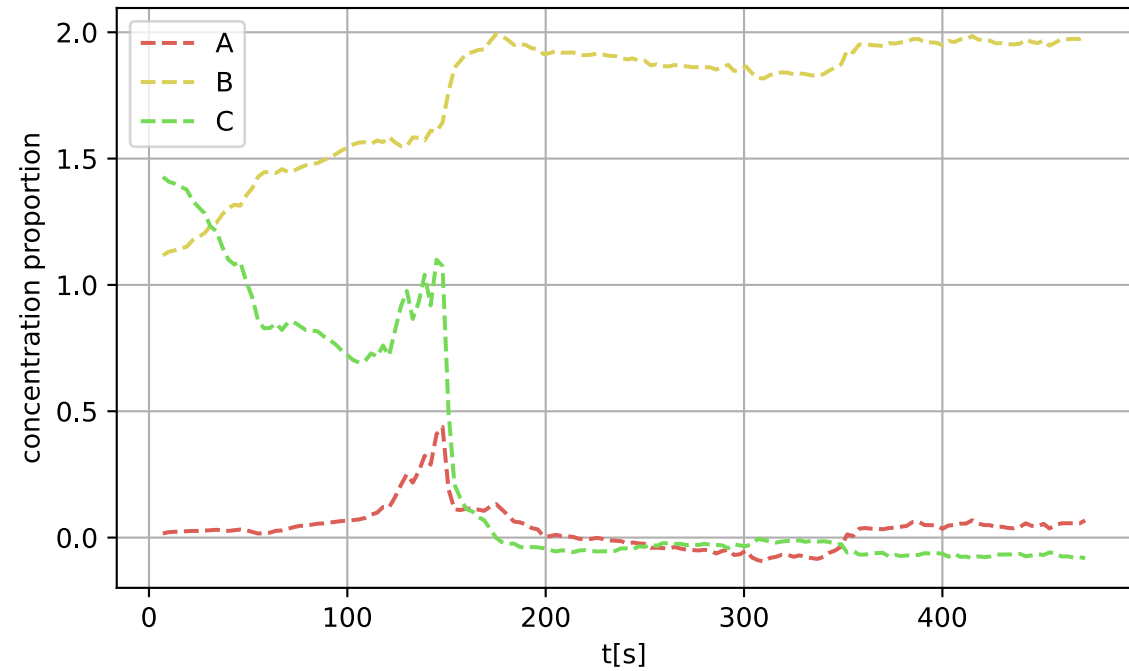

Plot  $W$

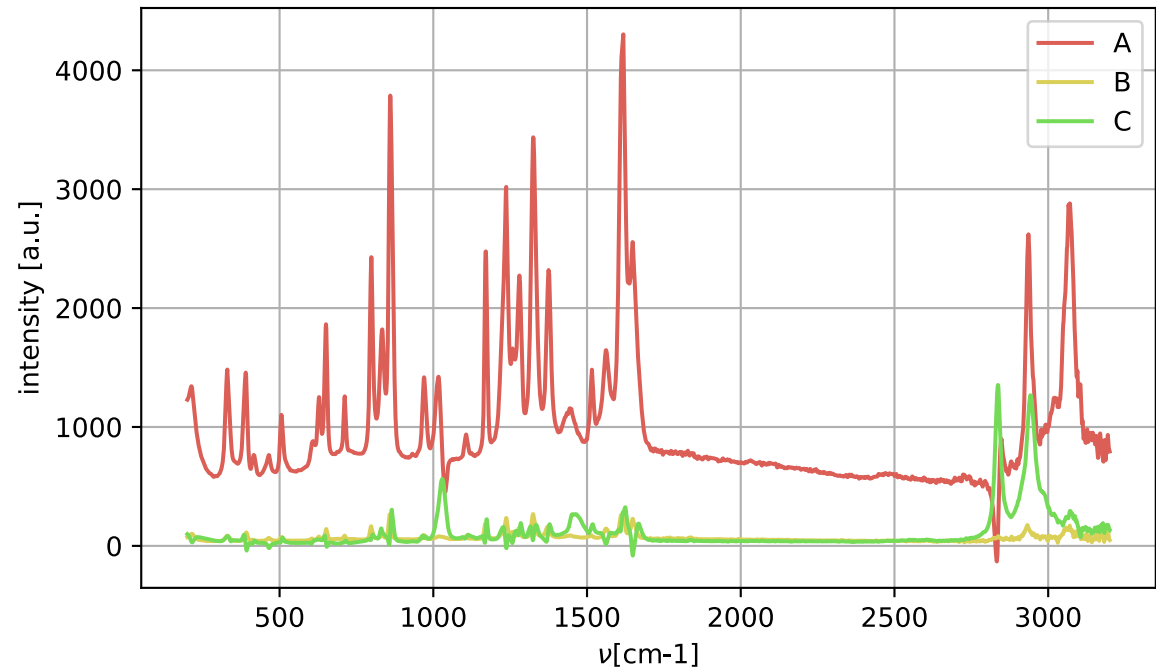

Supplement: s1 [file s1]

# SepFree NMF

Plot  $H$

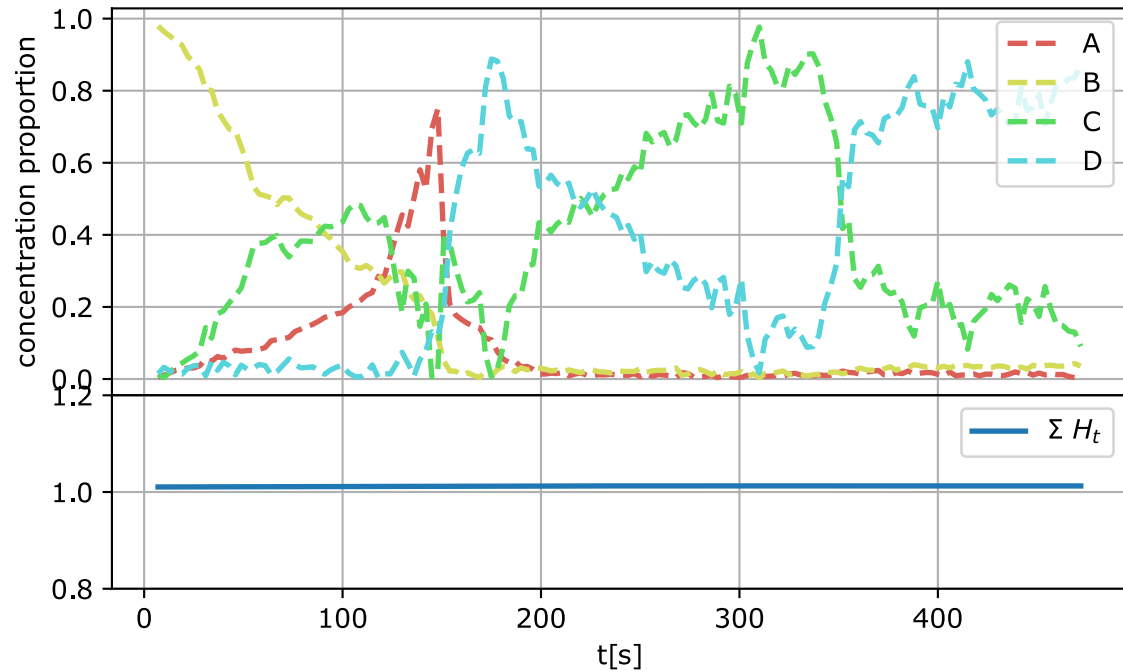

Plot  $W$

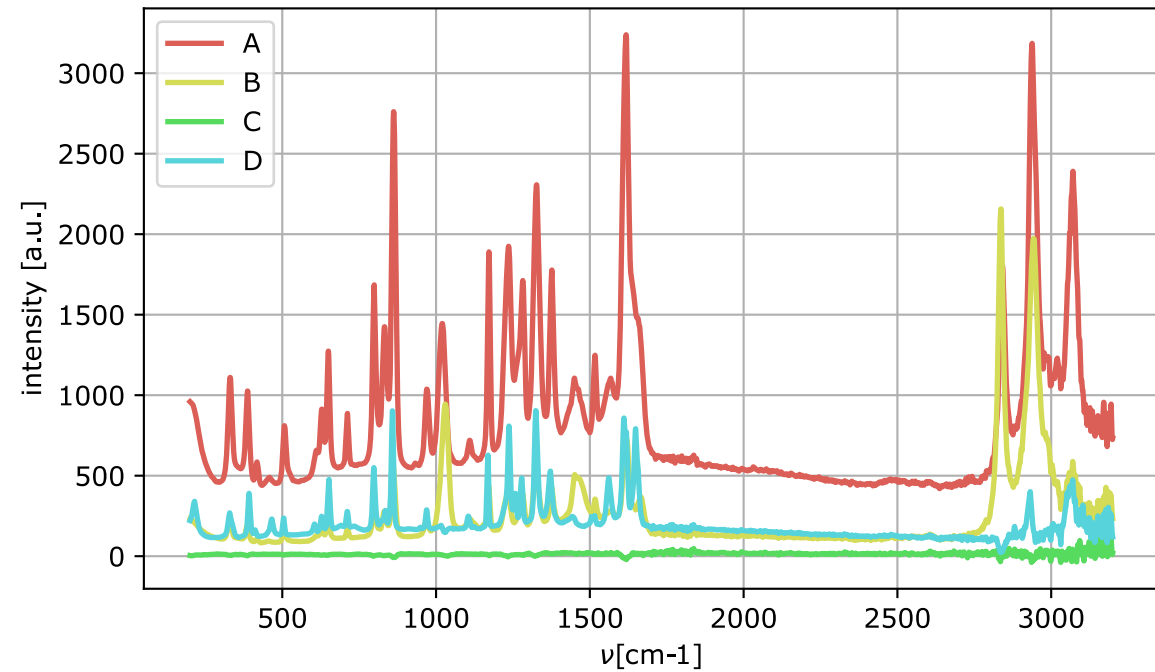

Supplement: s1 [file s1]

# NMF without separability assumption

Plot  $H$

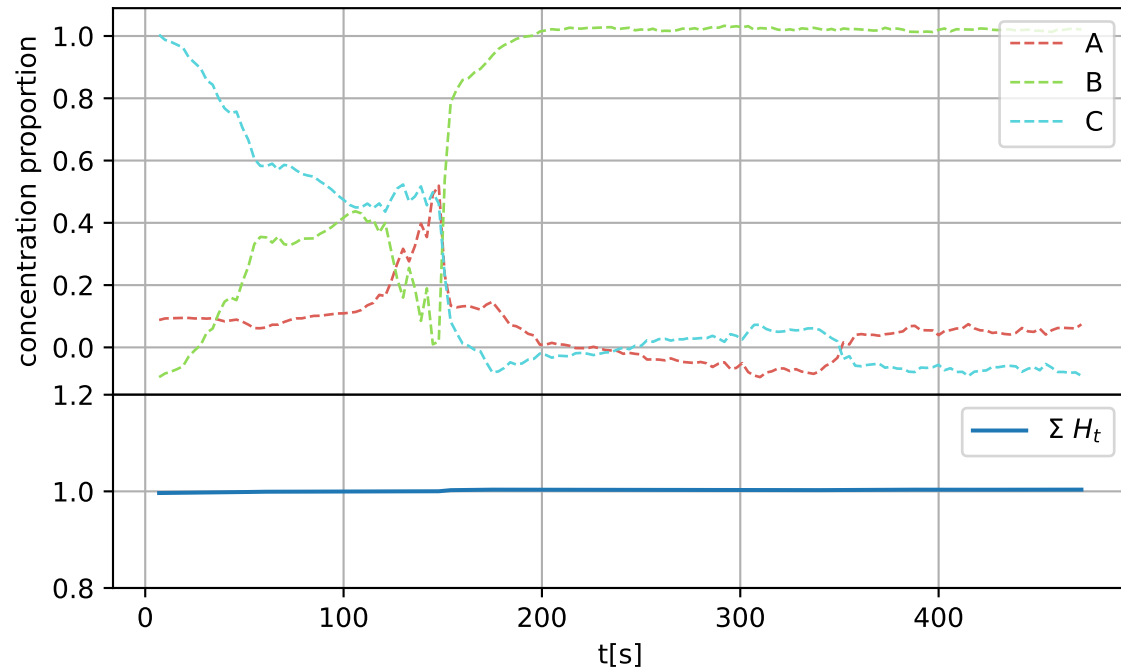

Plot  $W$

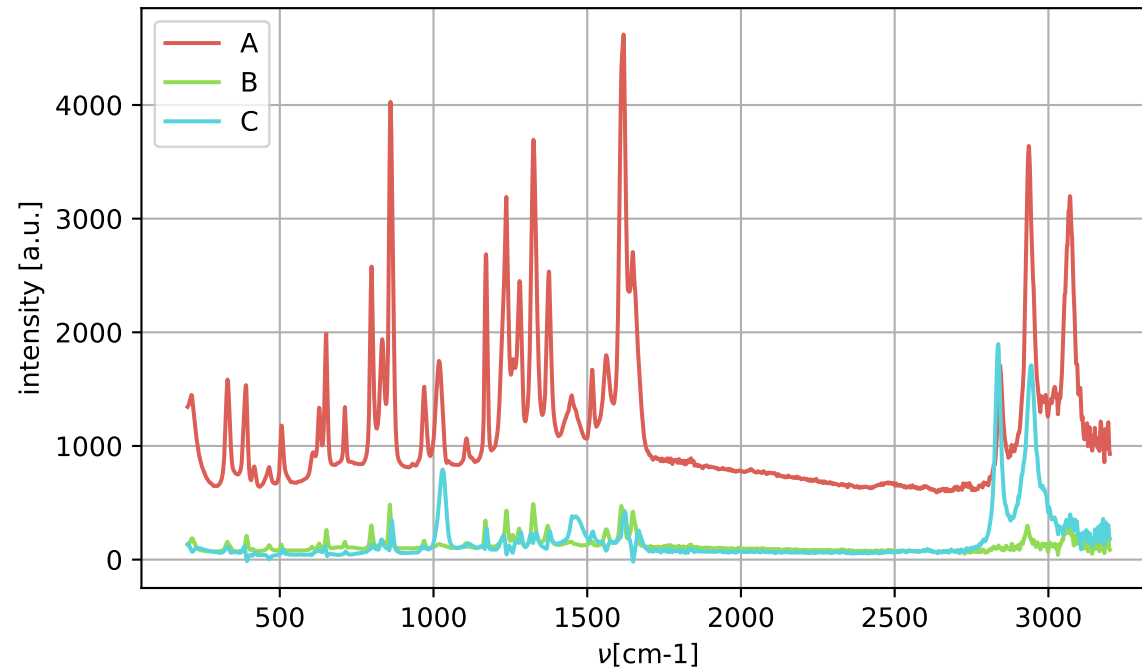

Supplement: s1 [file s1]

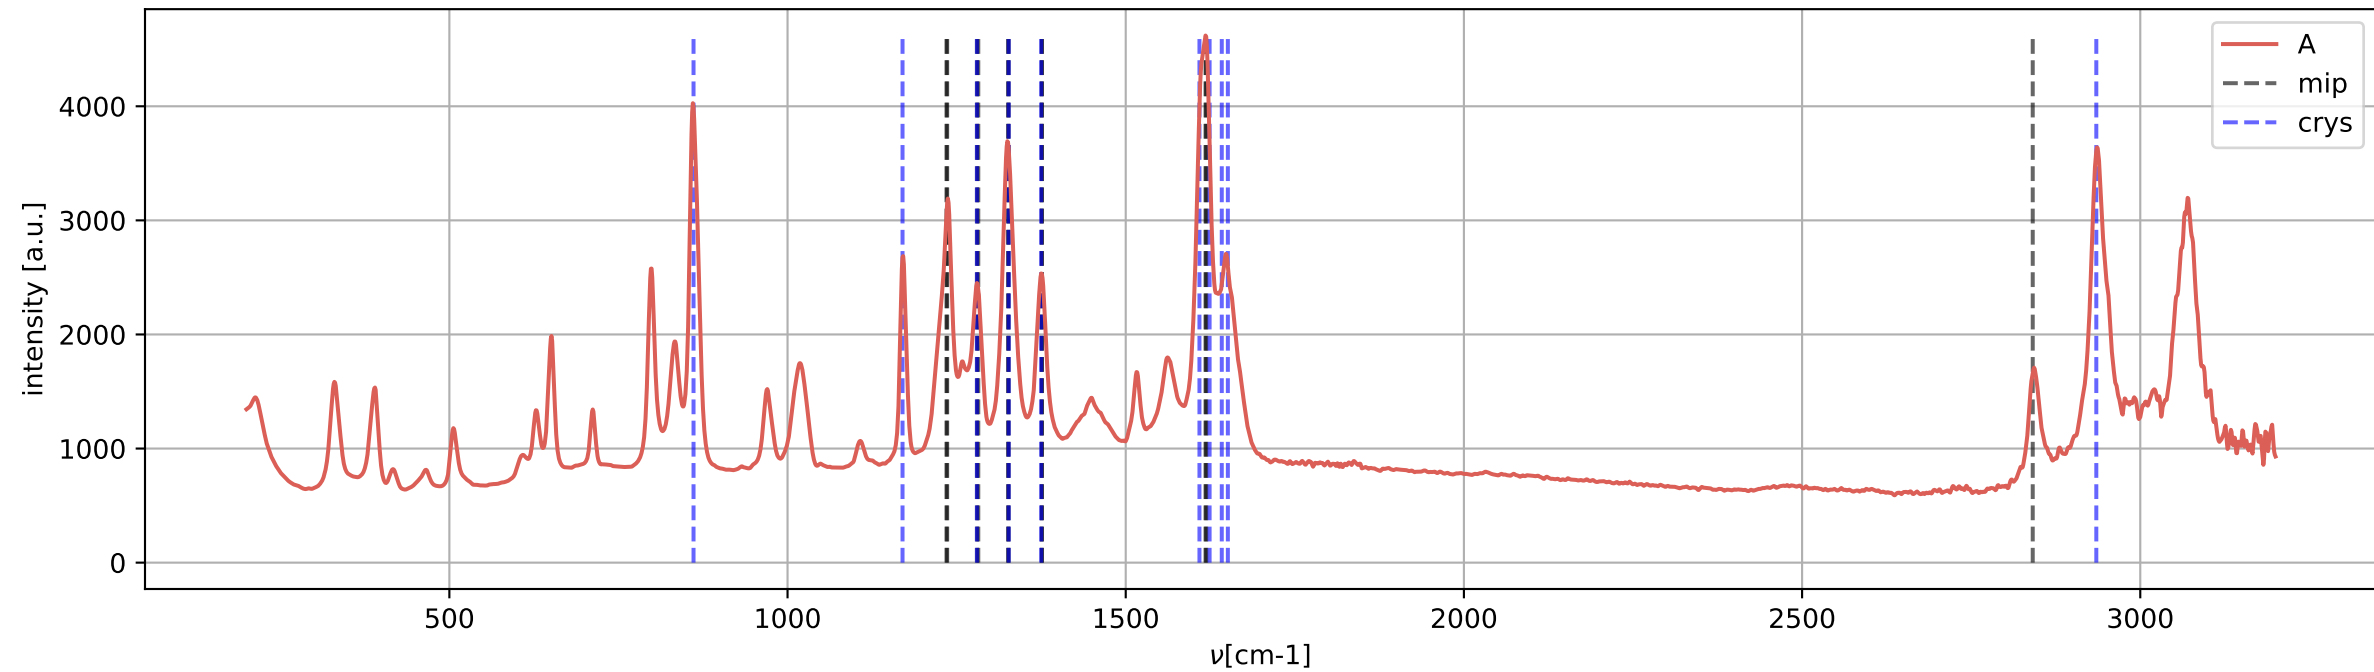

Supplement: s1 [file s1]

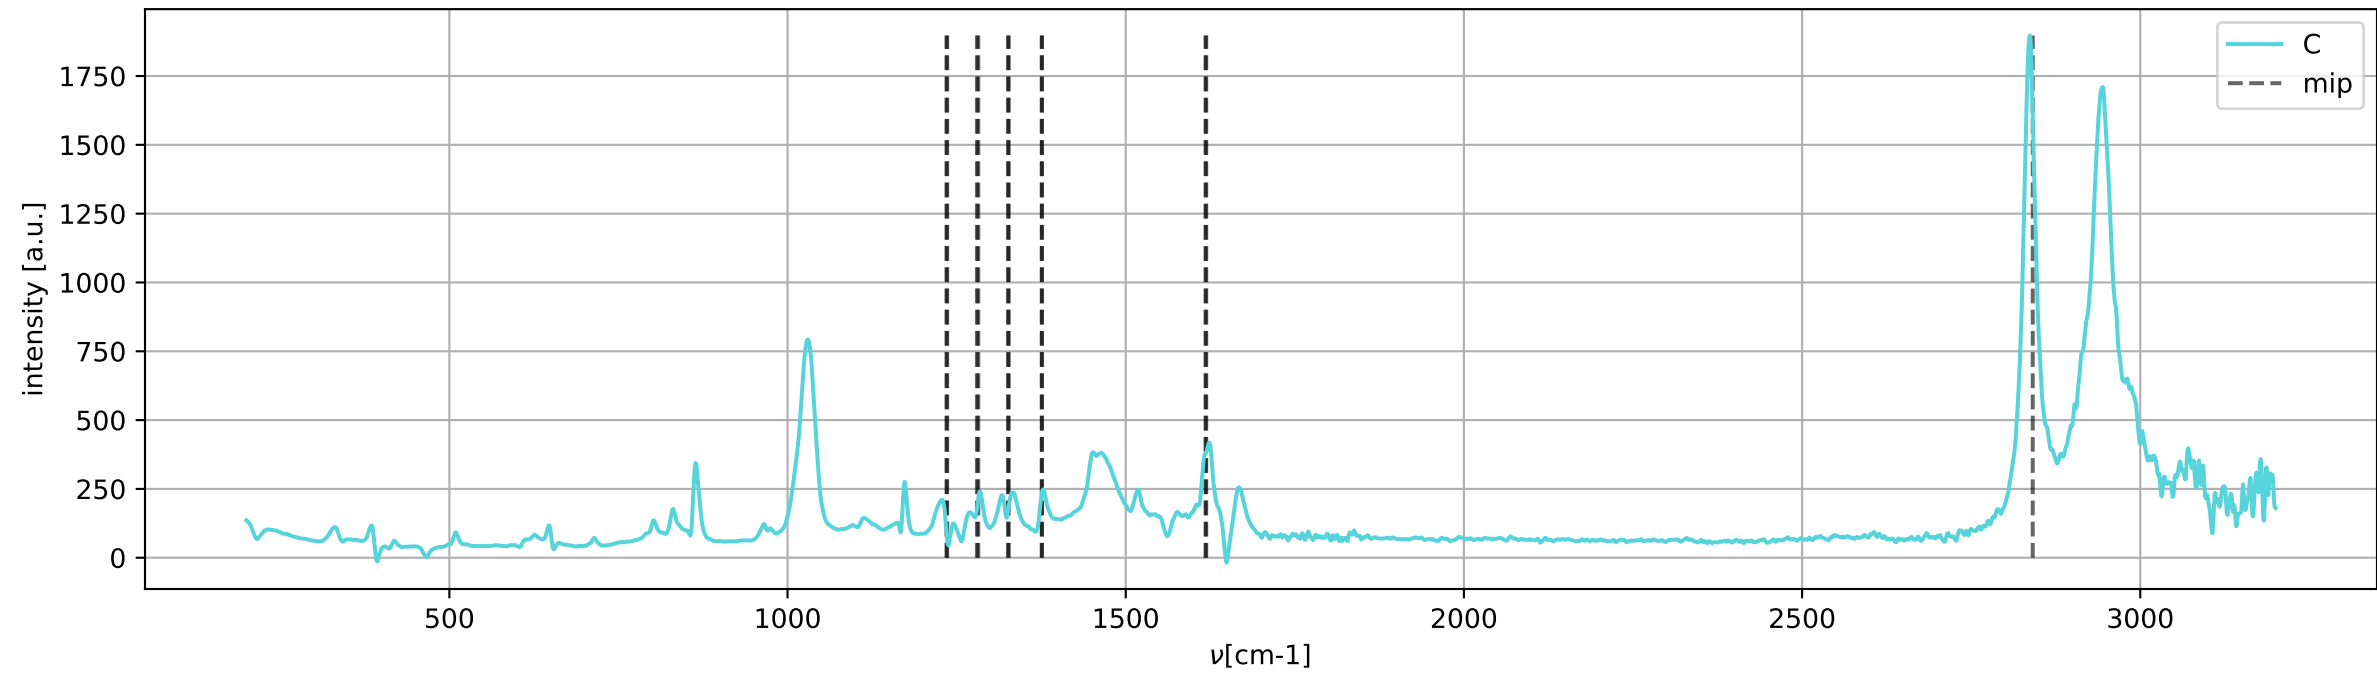

Supplement: s1 [file s1]

Synthetic Raman spectrum

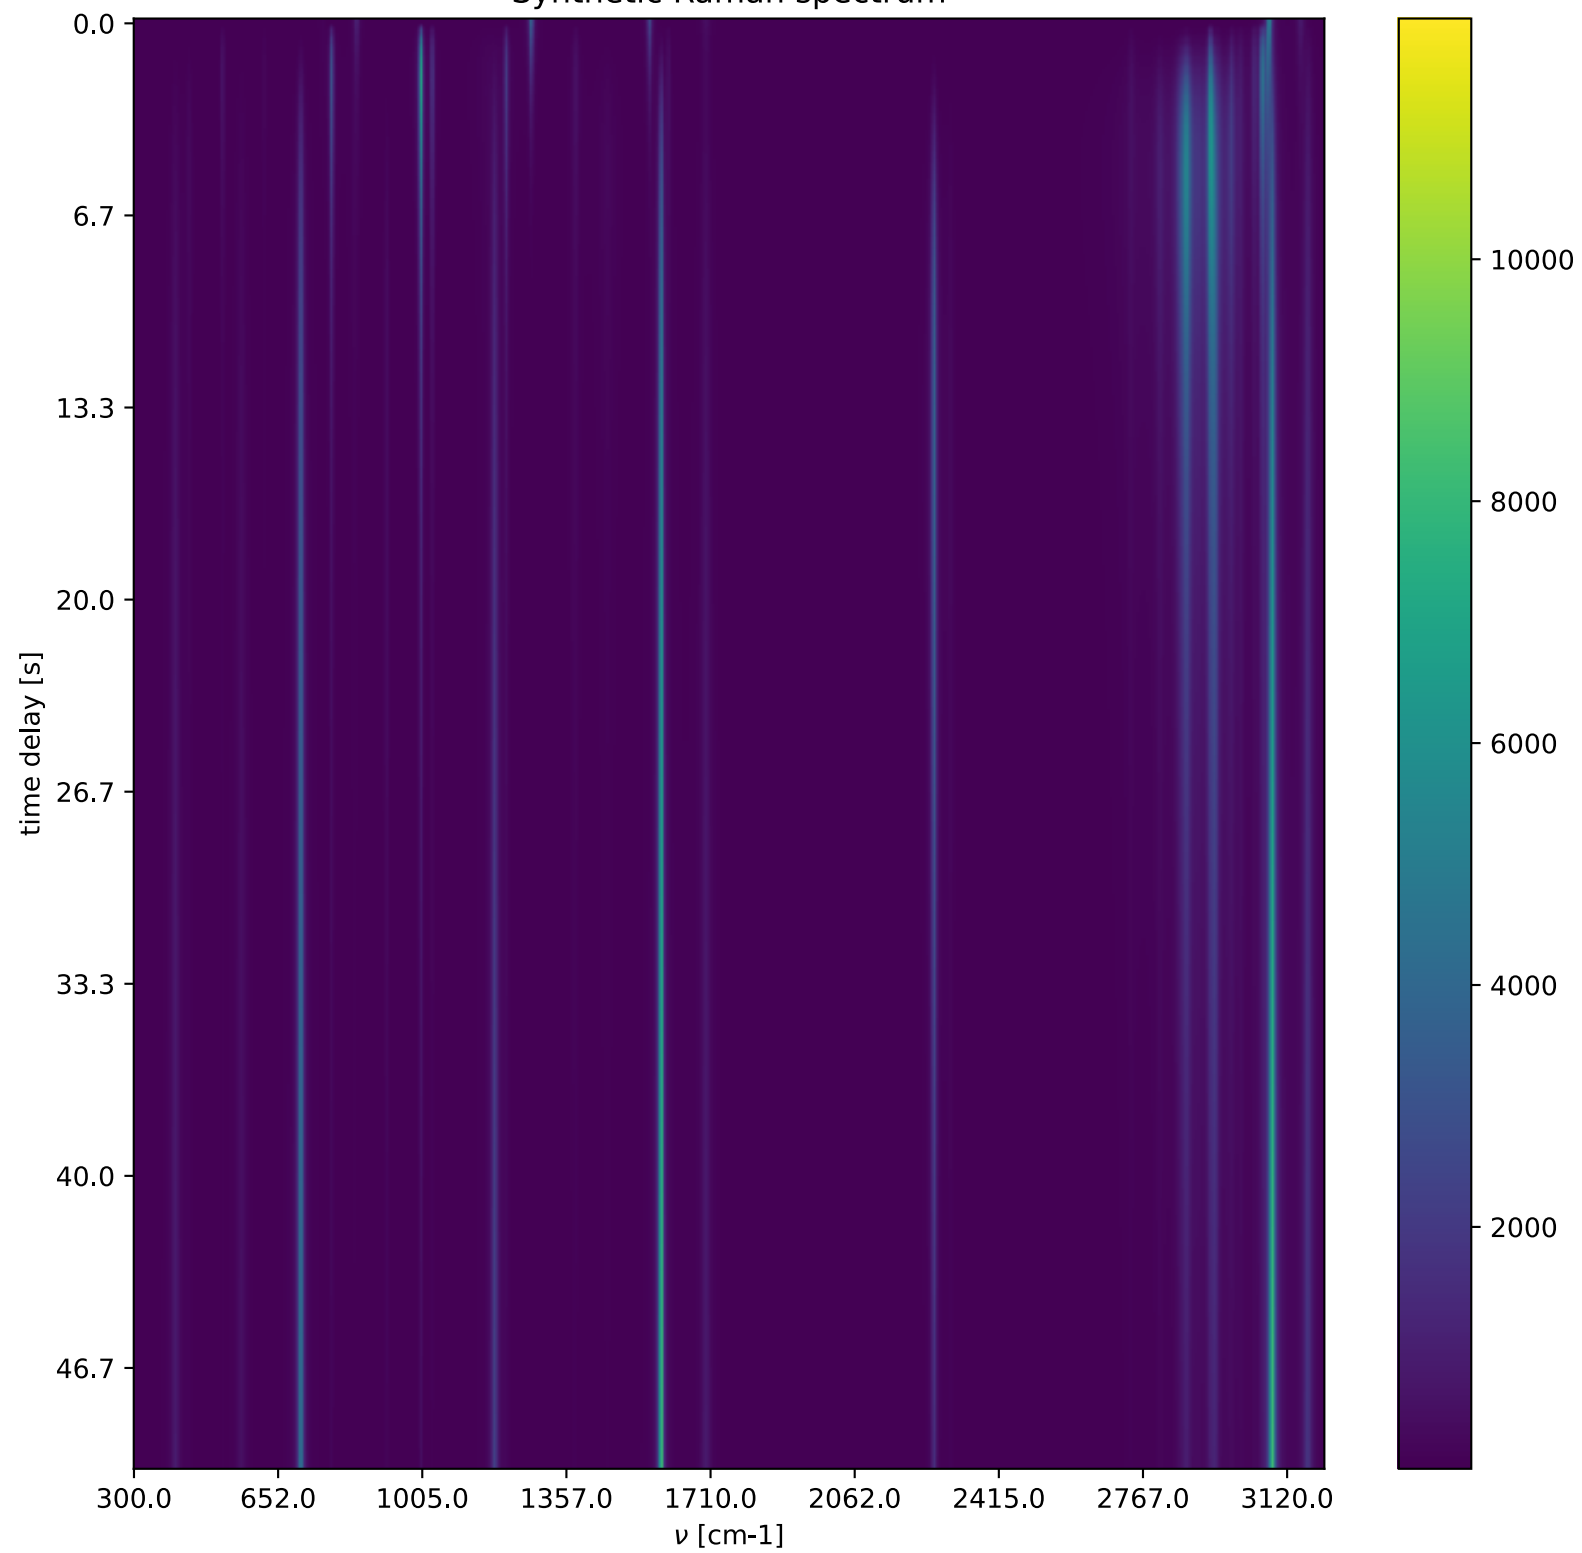

Supplement: s1 [file s1]

# NMF with PCCA+ analysis

Plot  $H$

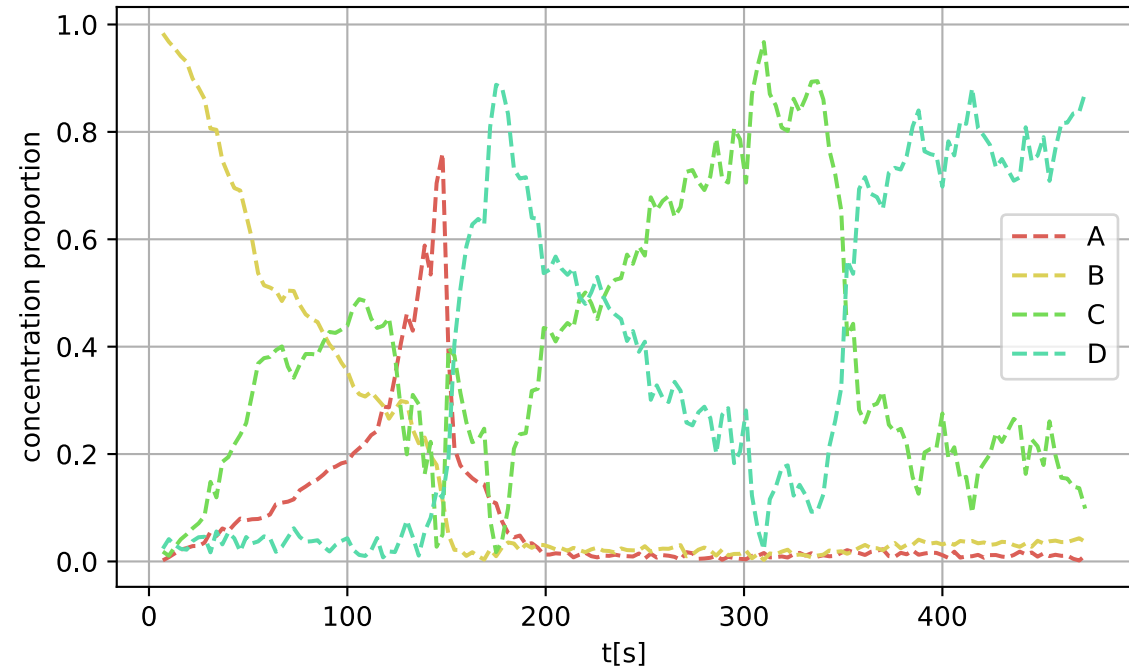

Plot  $W$

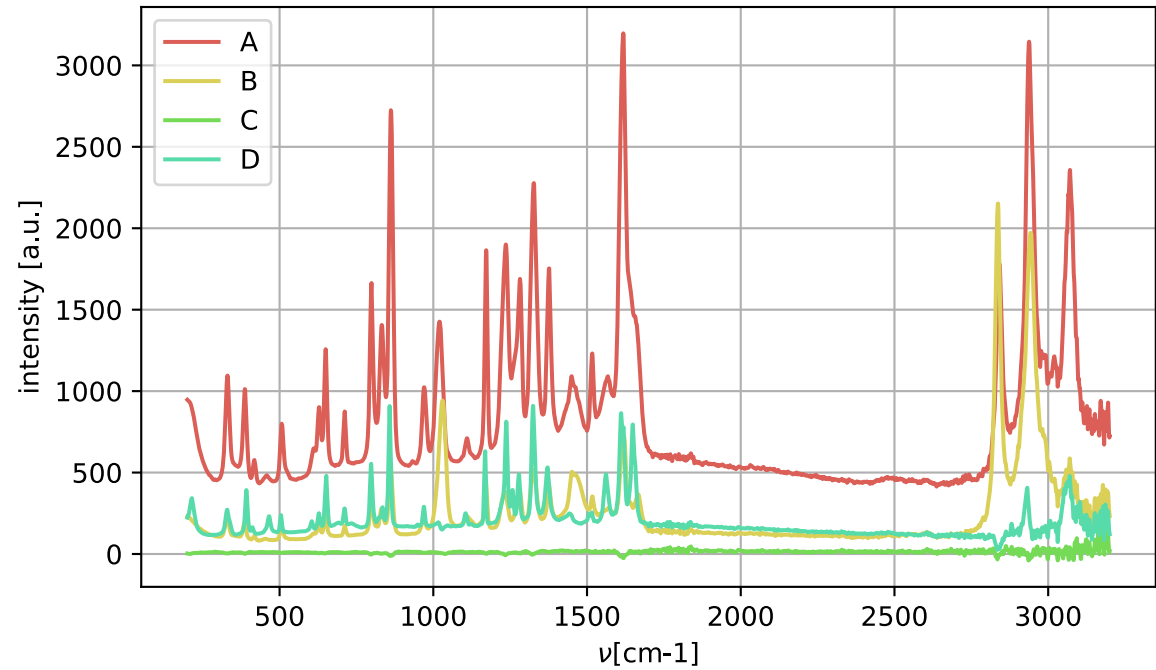

Supplement: s1 [file s1]

# SepFree NMF

Plot  $H$

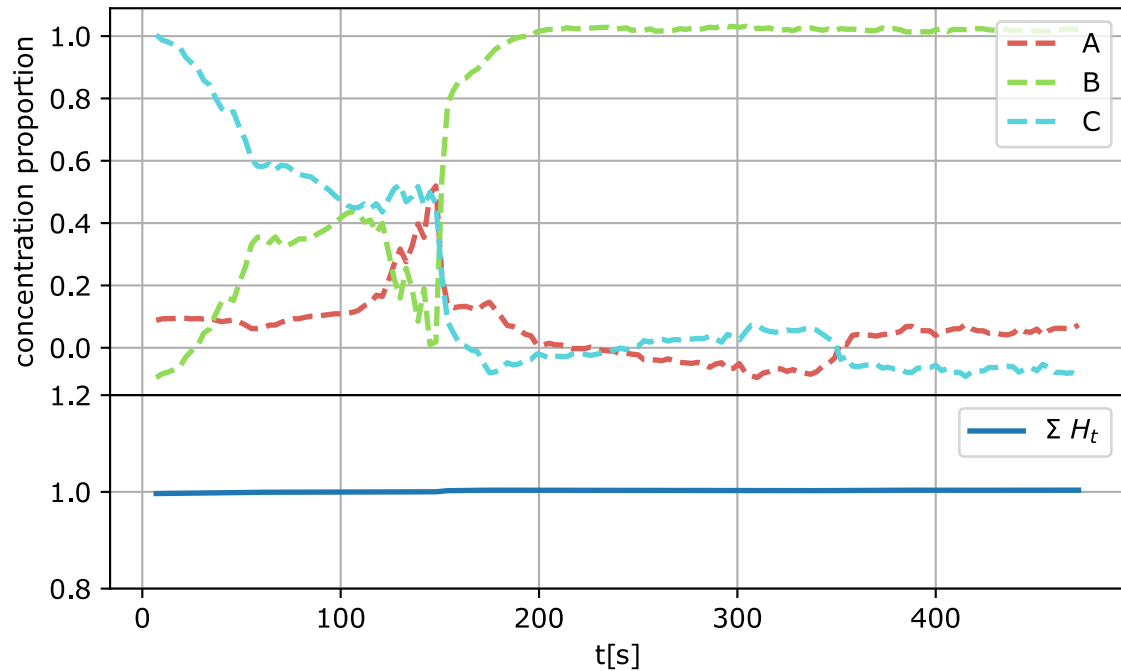

Plot  $W$

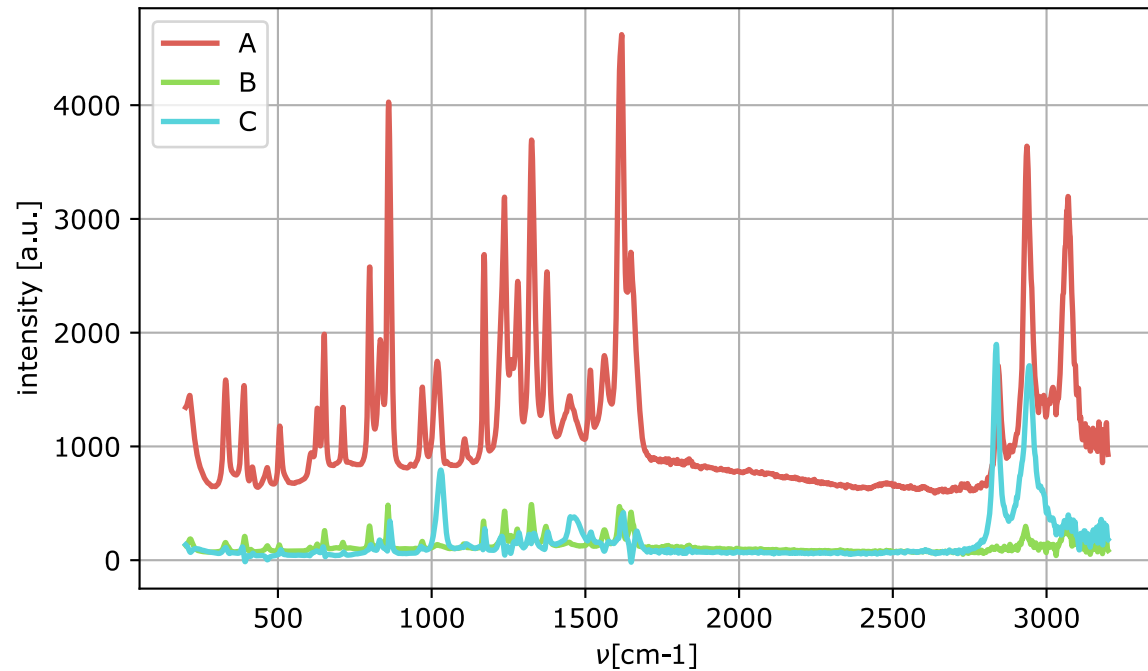

Supplement: s1 [file s1]

# Synthetic kinetics and amplitudes

Plot  $H$

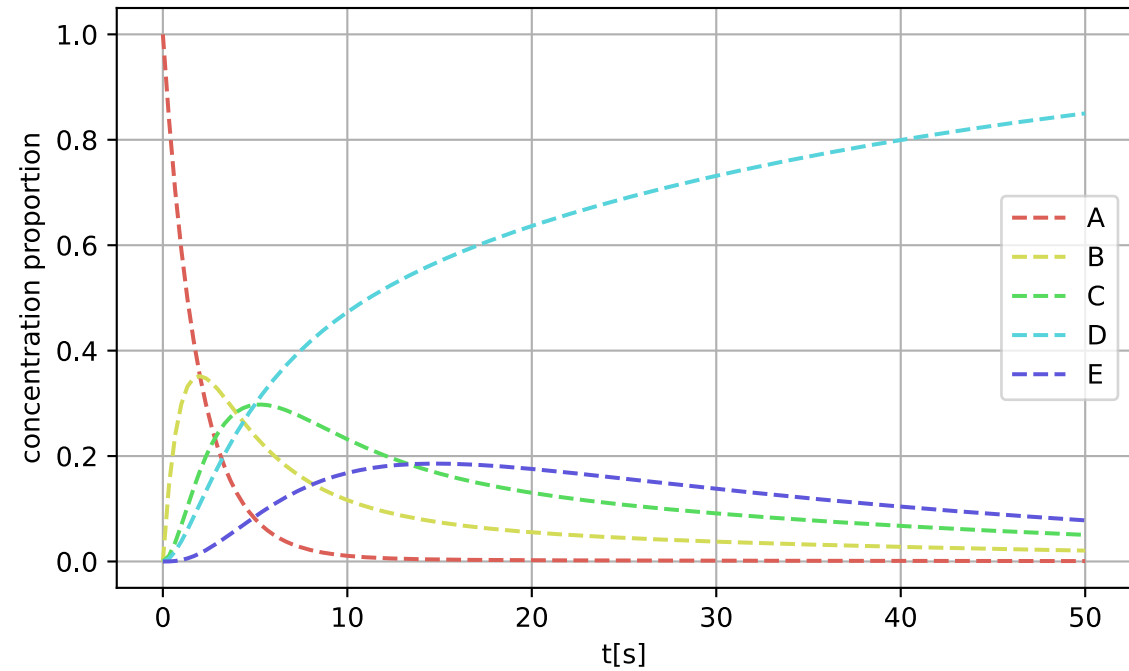

Plot  $W$

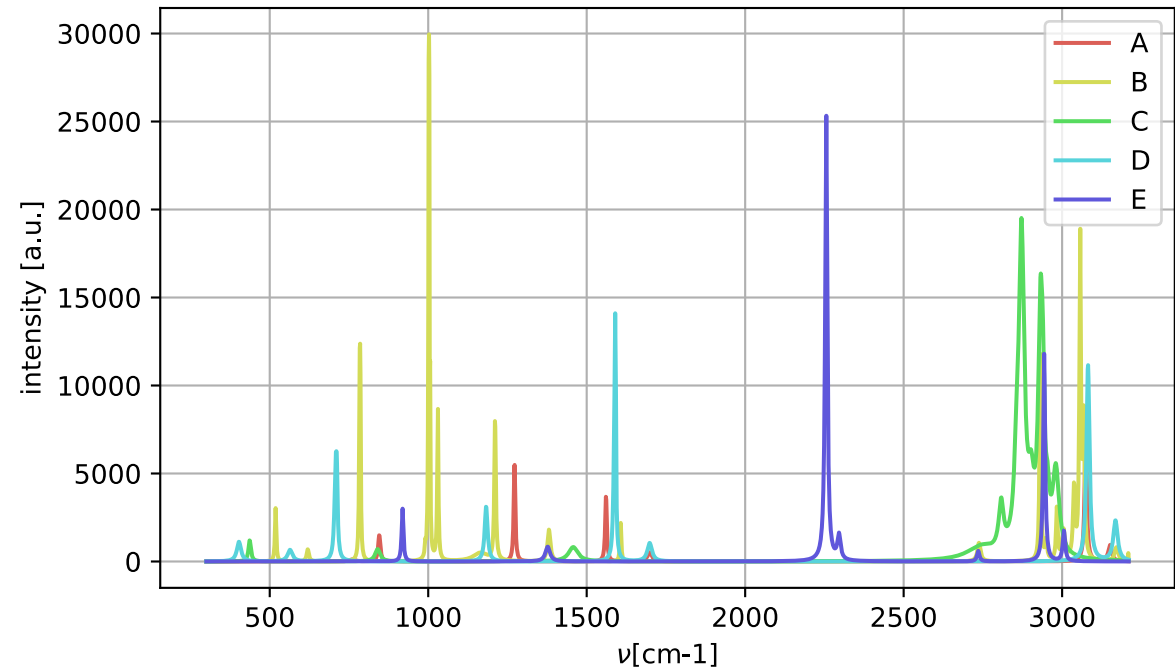

Supplement: s1 [file s1]

# NMF without separability assumption

Plot  $H$

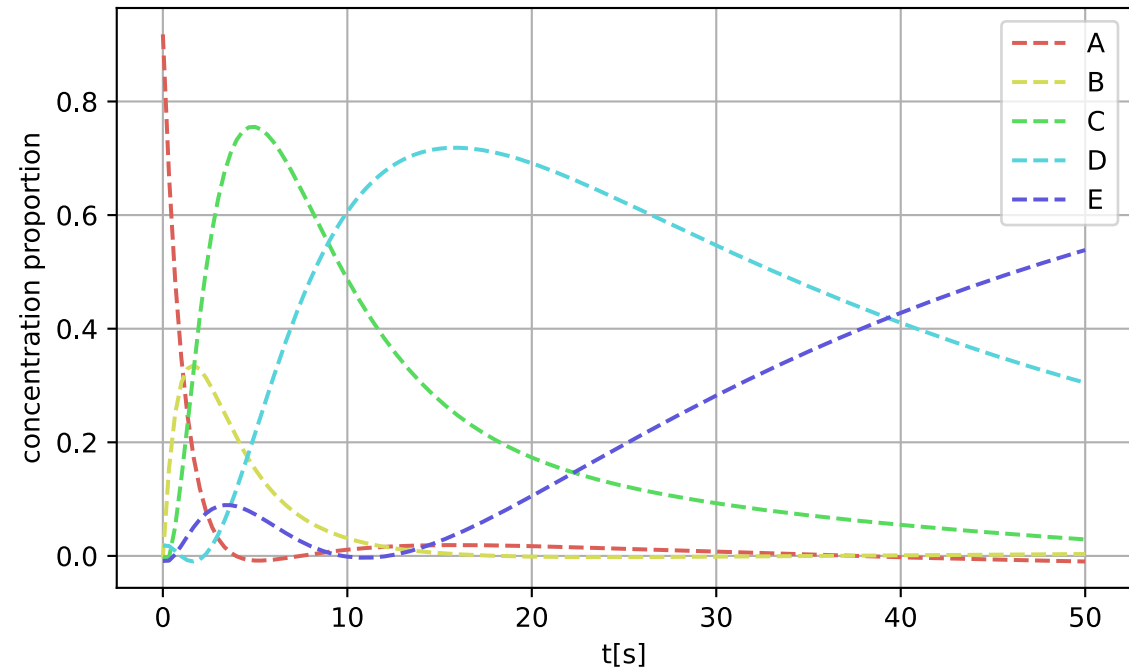

Plot  $W$

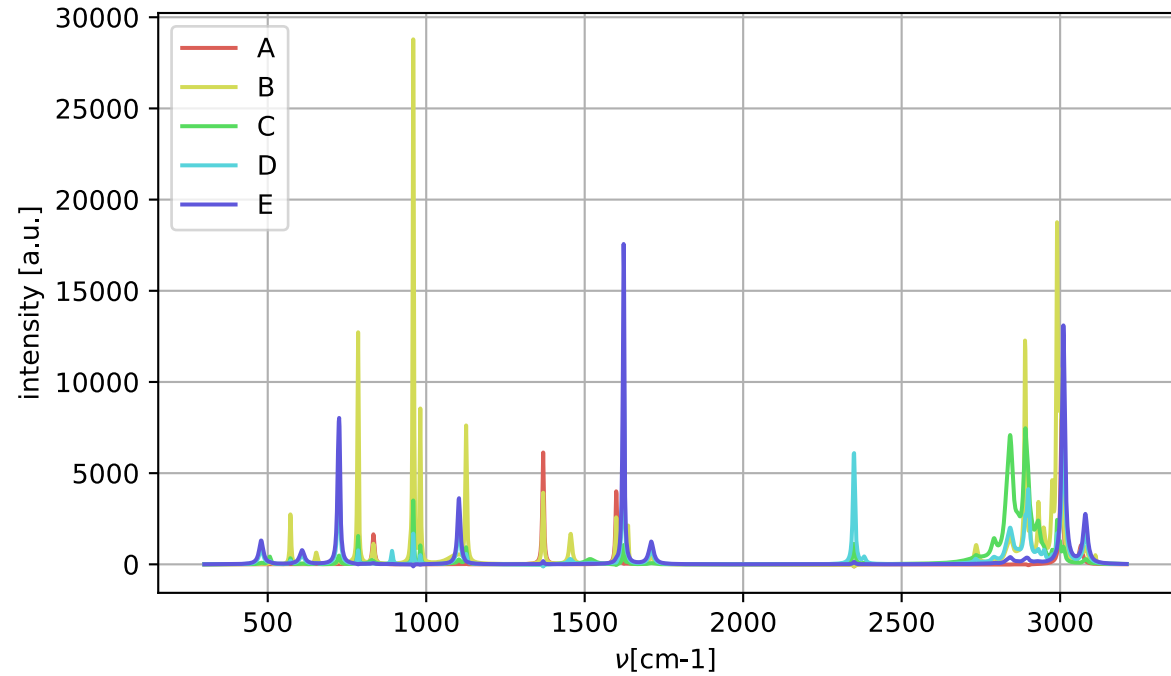

Supplement: s1 [file s1]

# NMF with PCCA+ analysis

Plot  $H$

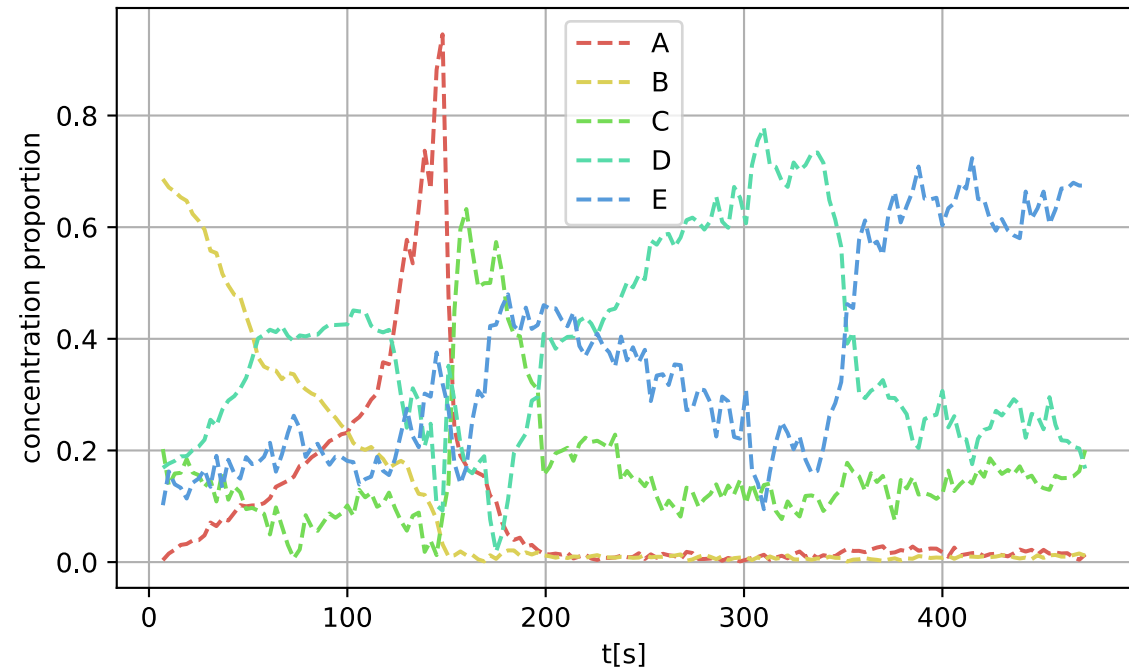

Plot  $W$

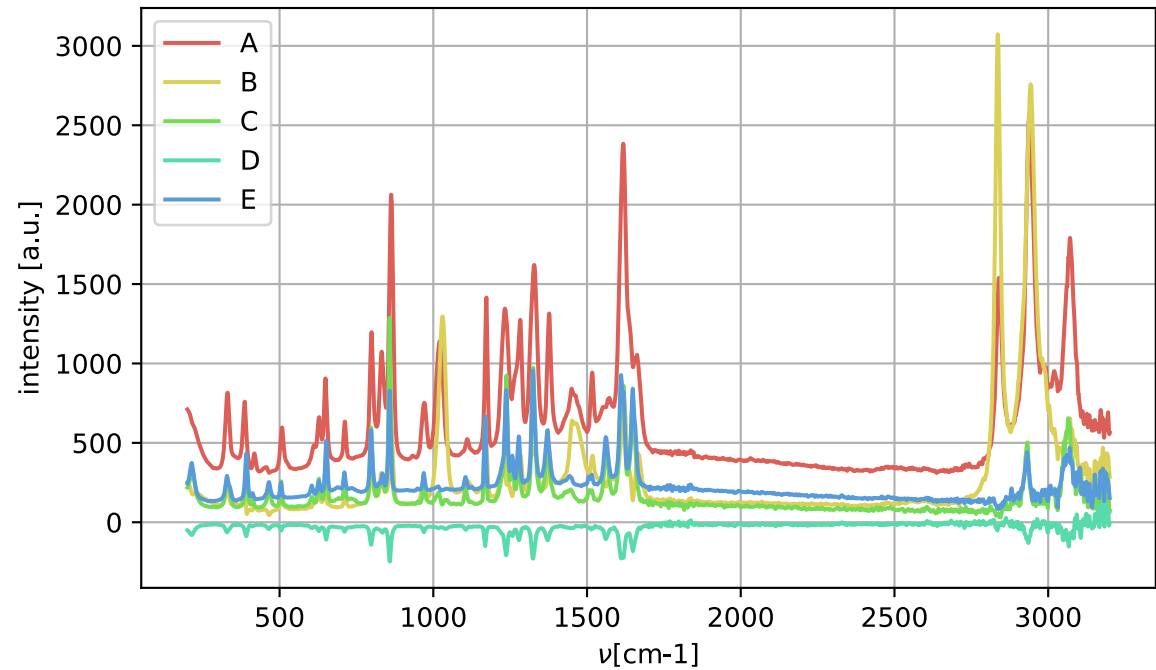

Supplement: s1 [file s1]

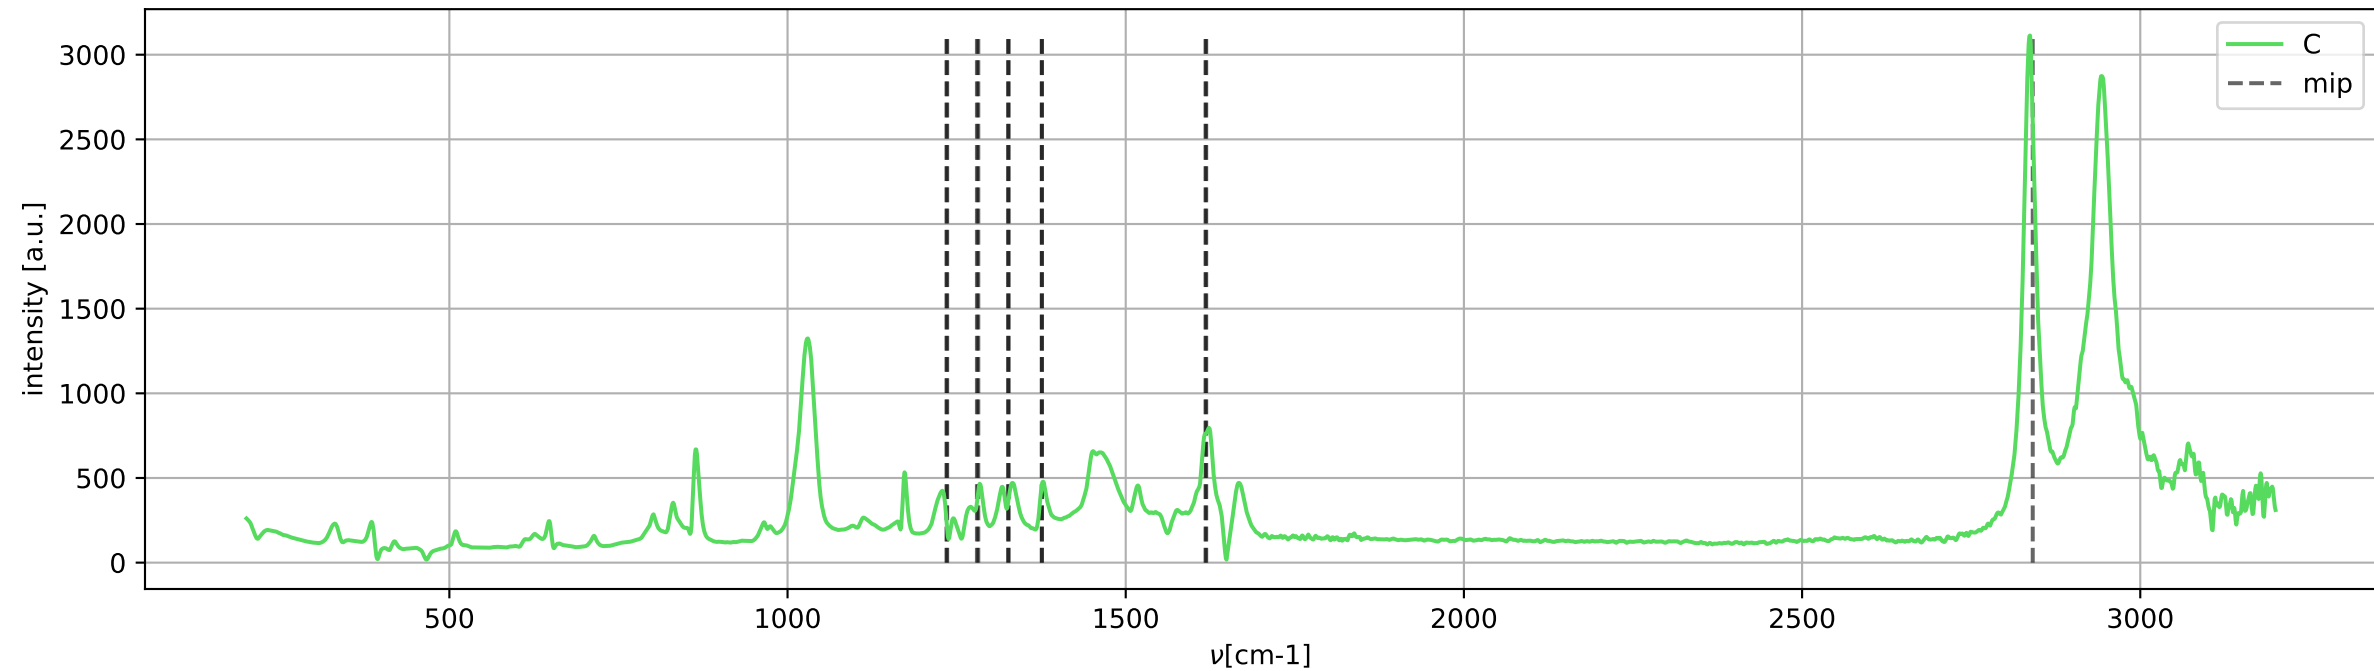

Supplement: s1 [file s1]

# SepFree NMF

Plot  $H$

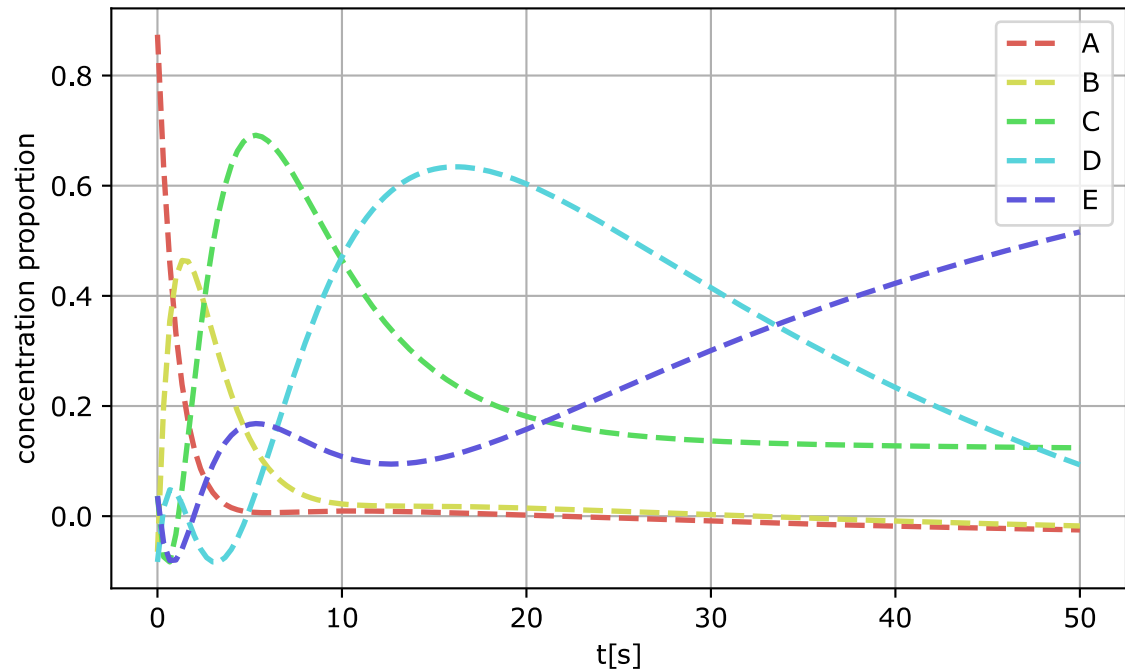

Plot  $W$

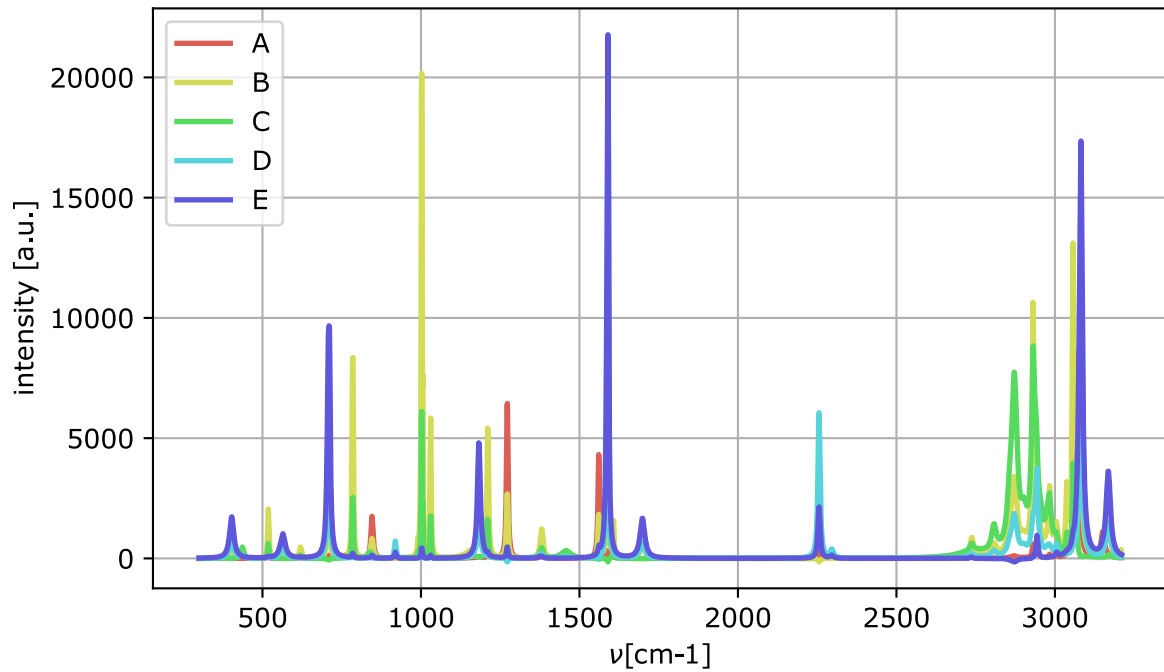

Supplement: s1 [file s1]

# NMF without separability assumption

Plot  $H$



Plot  $W$

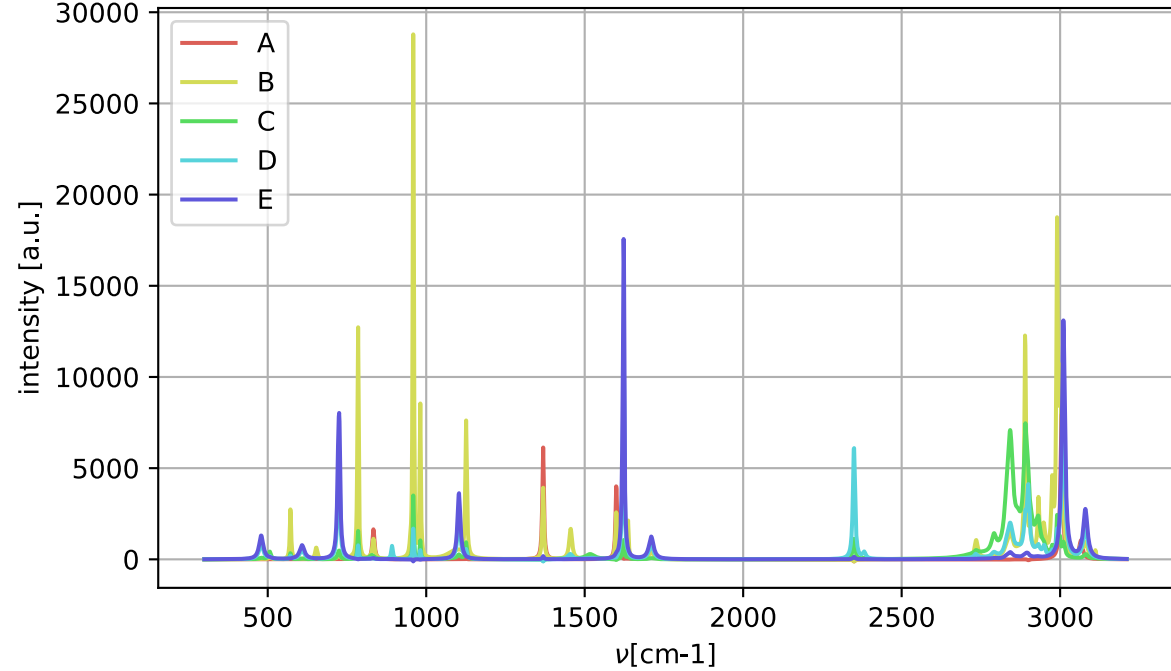

Supplement: s1 [file s1]

# SepFree NMF

Plot  $H$

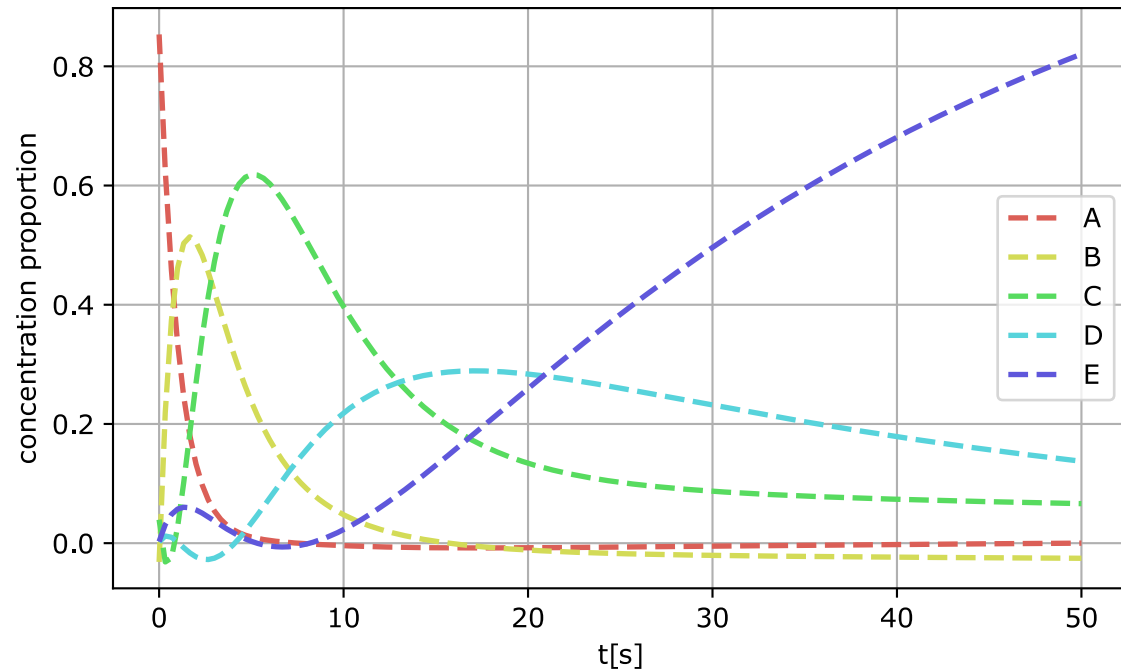

Plot  $W$

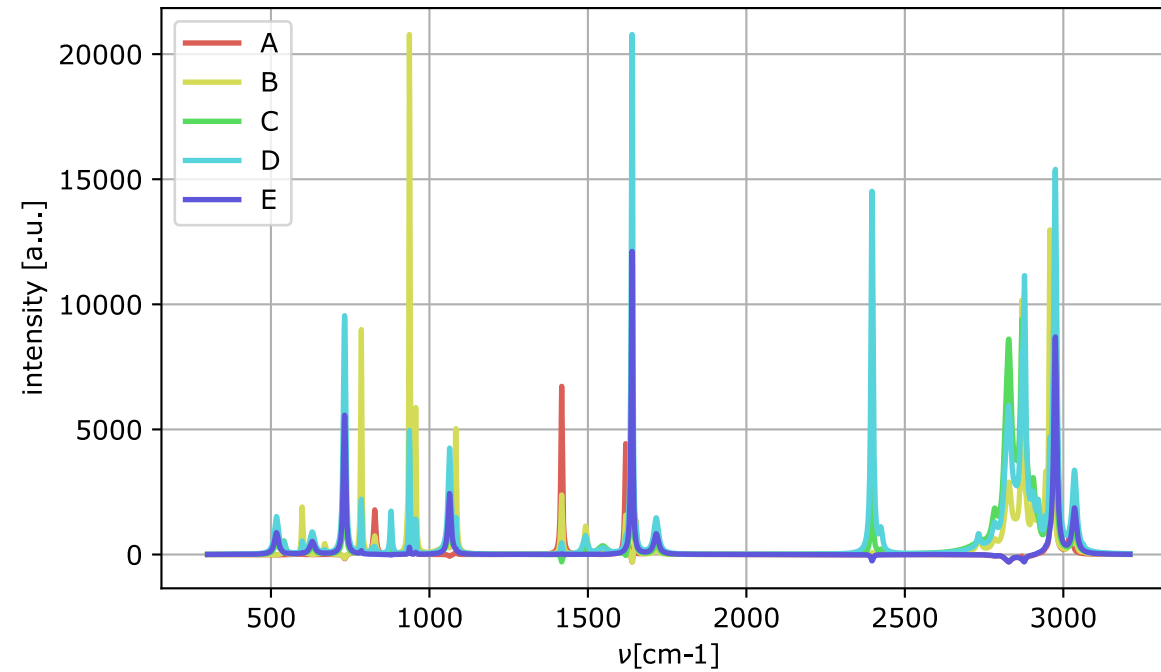

Supplement: s1 [file s1]

# NMF without separability assumption

Plot  $H$

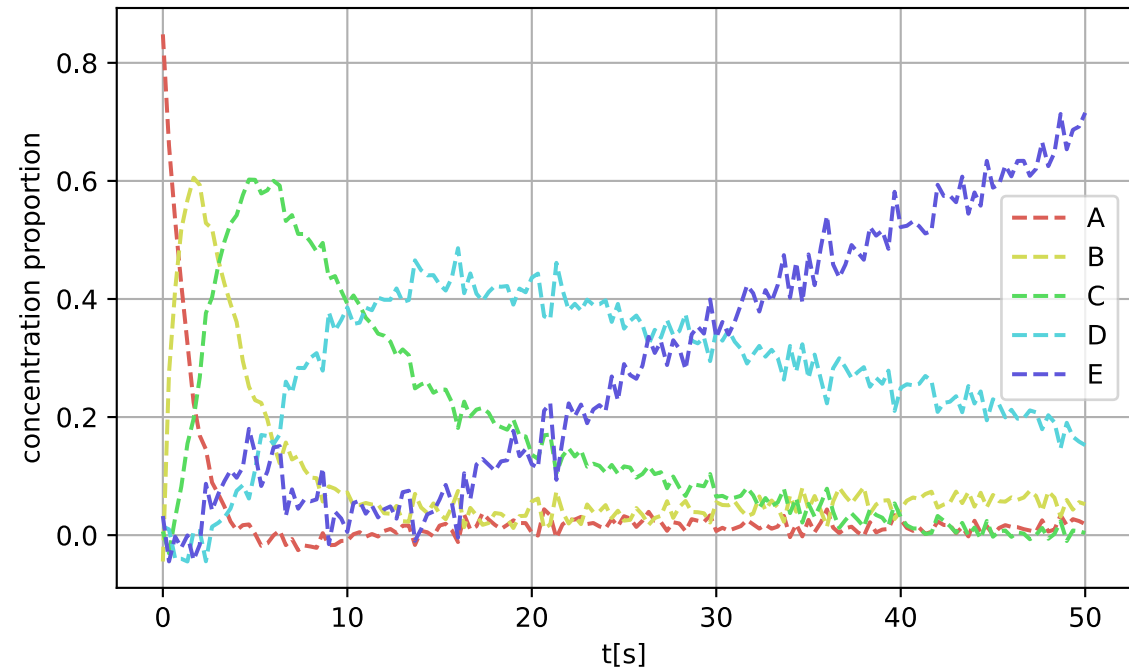

Plot  $W$

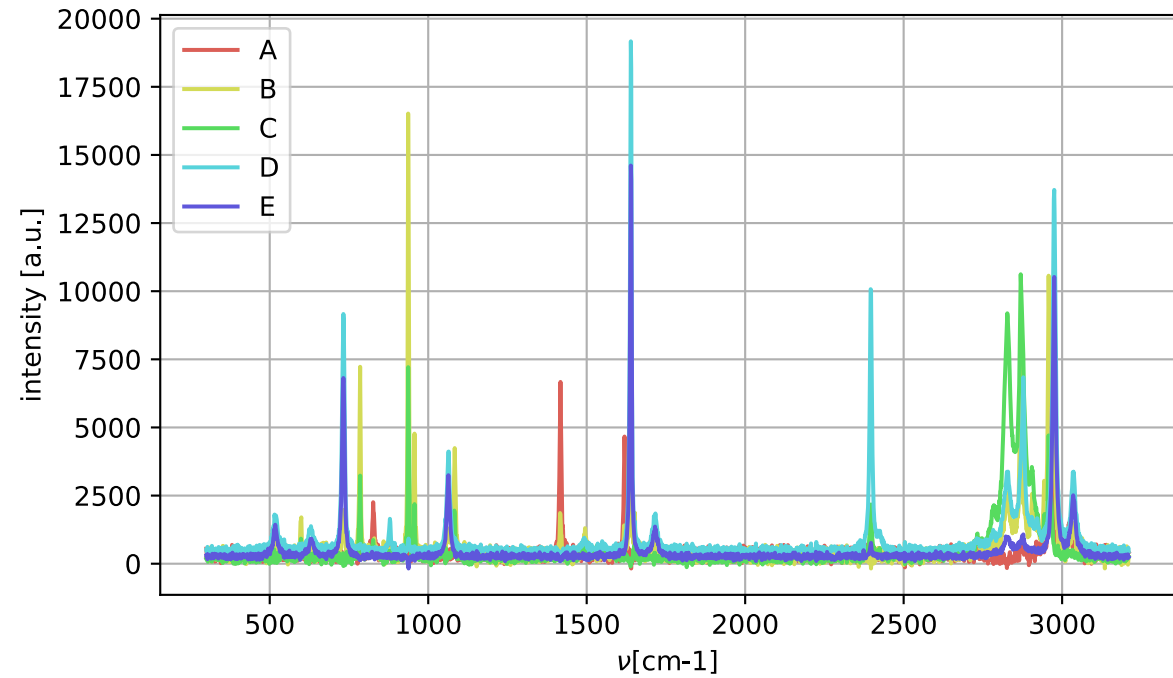

Supplement: s1 [file s1]

Synthetic Raman spectrum

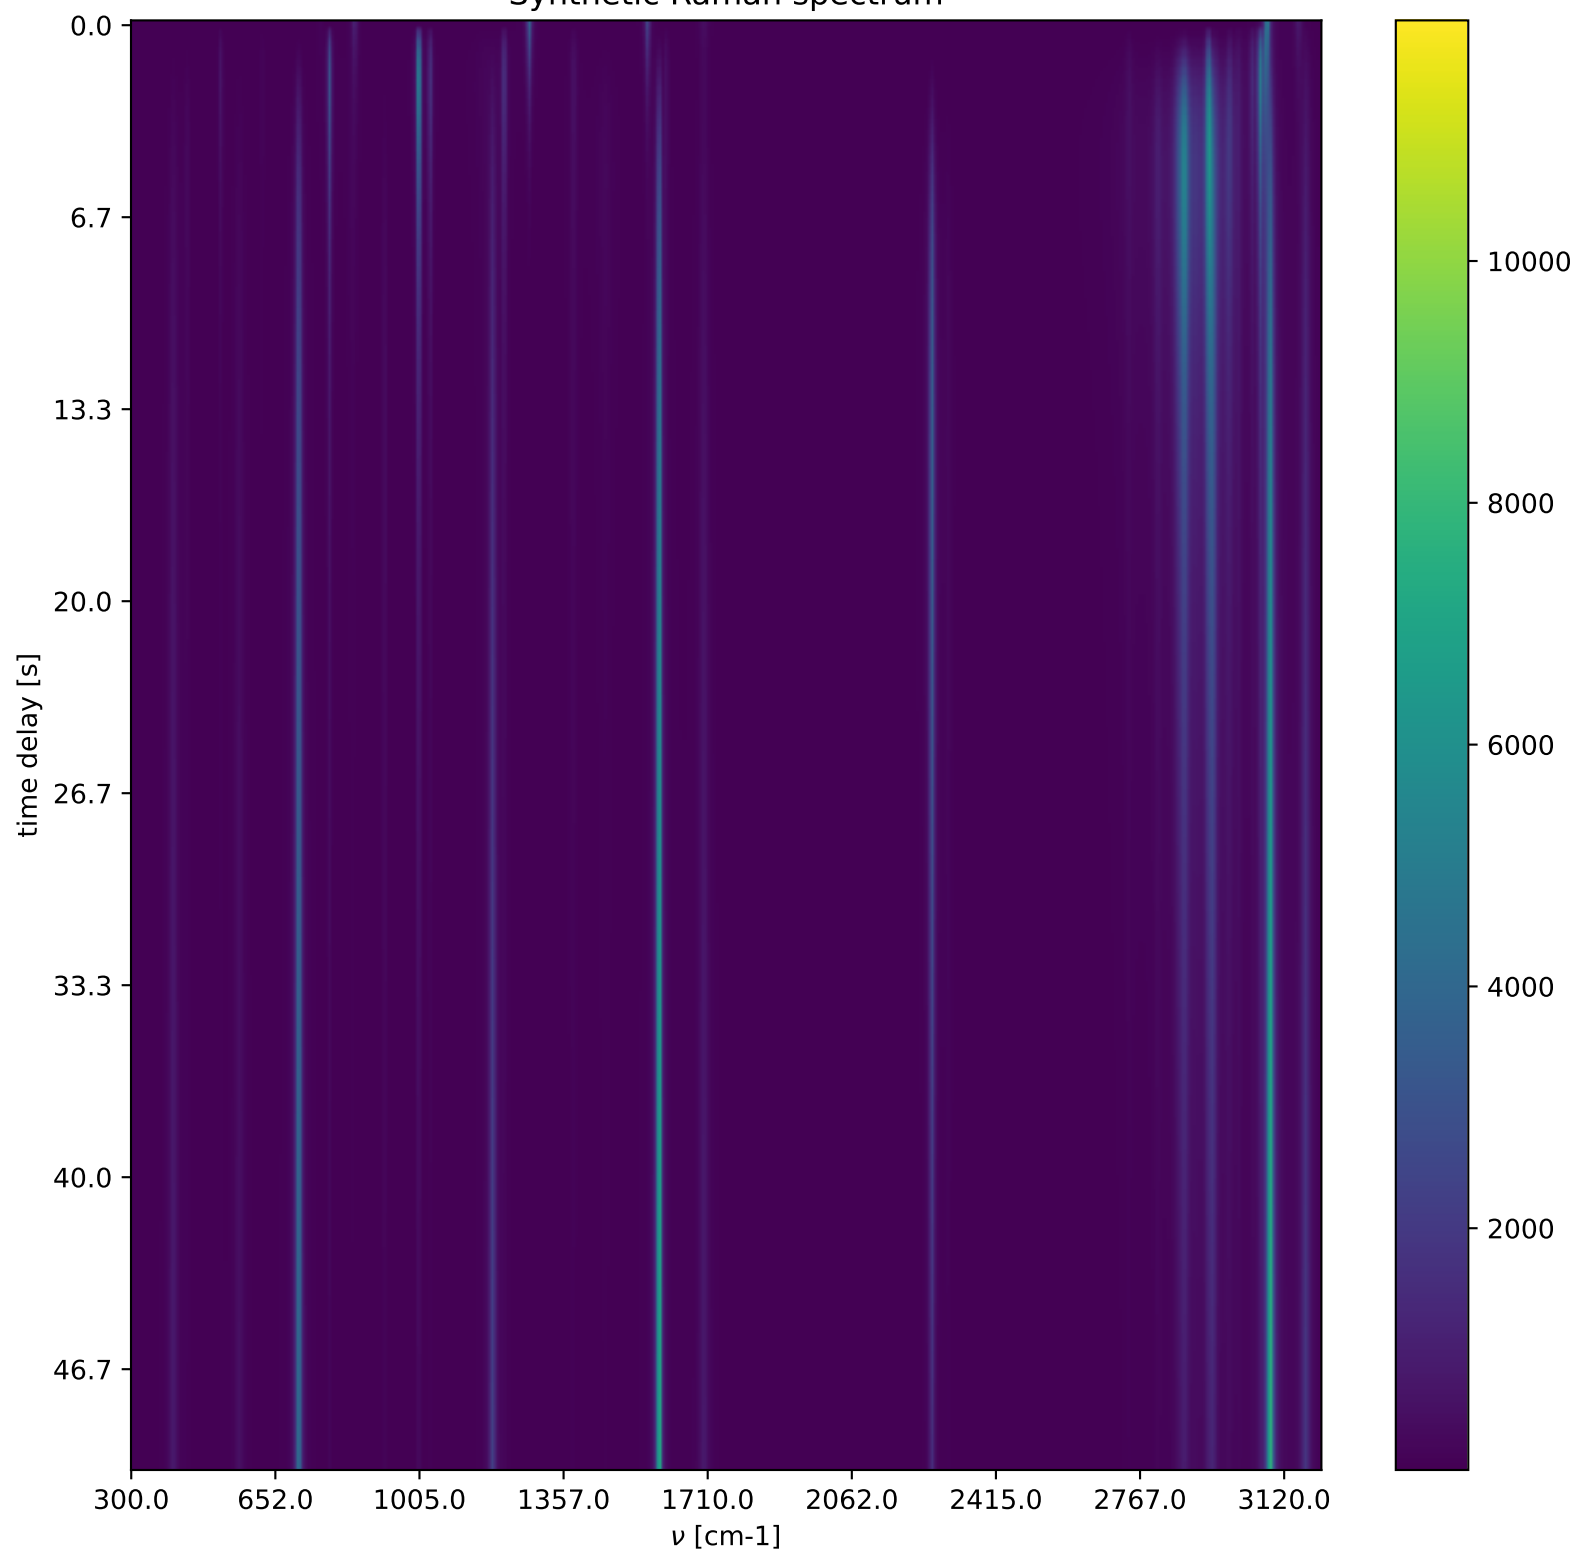

Supplement: s1 [file s1]

Crystallization of paracetamol in methanol

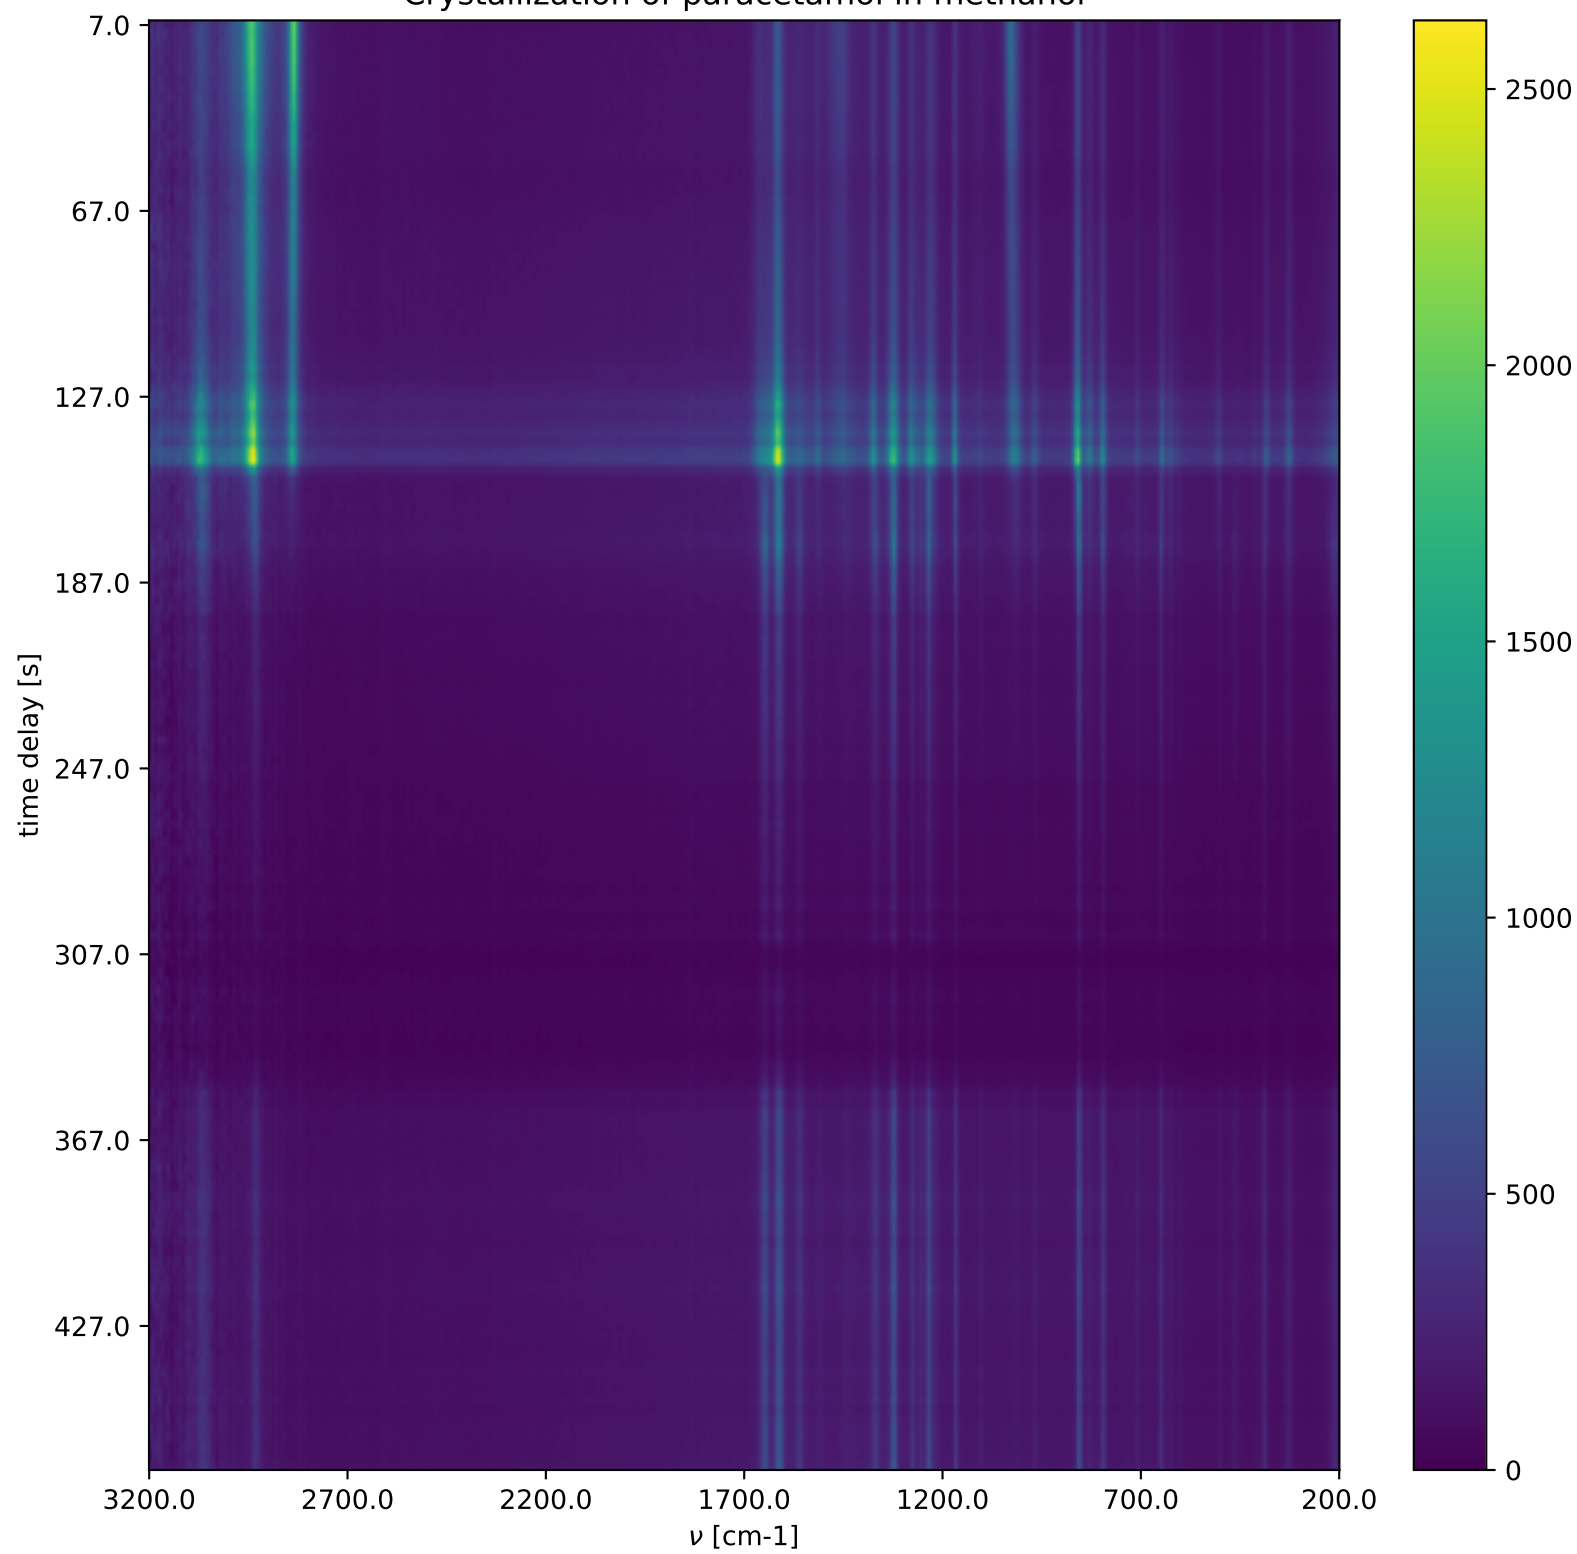

Supplement: s1 [file s1]

# SepFree NMF

Plot  $H$

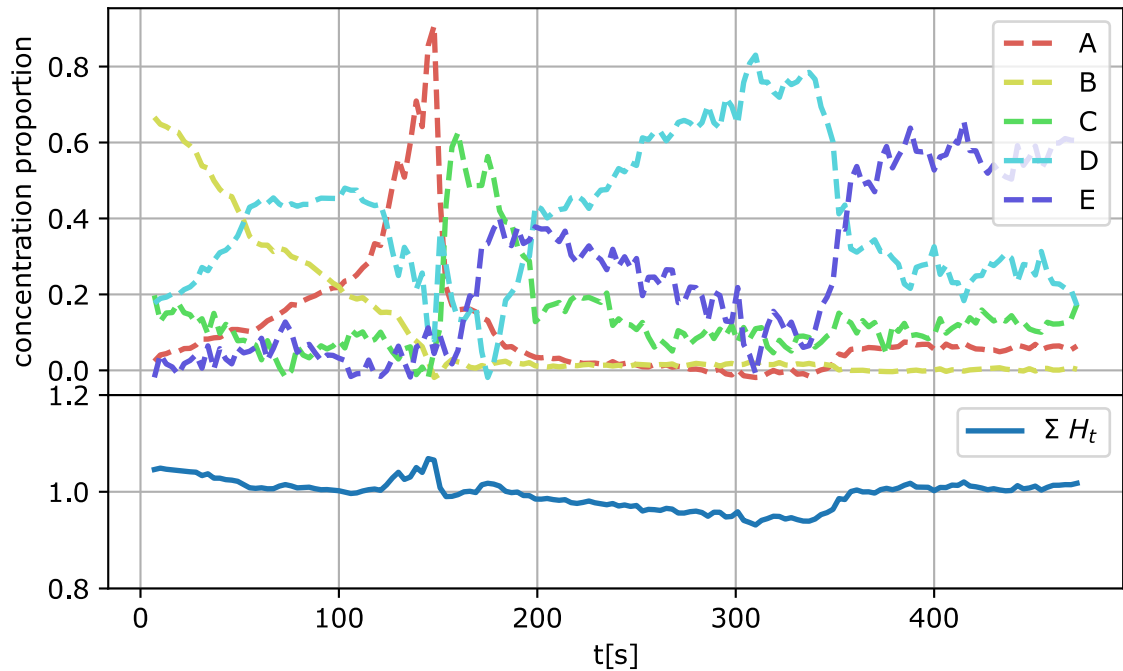

Plot  $W$

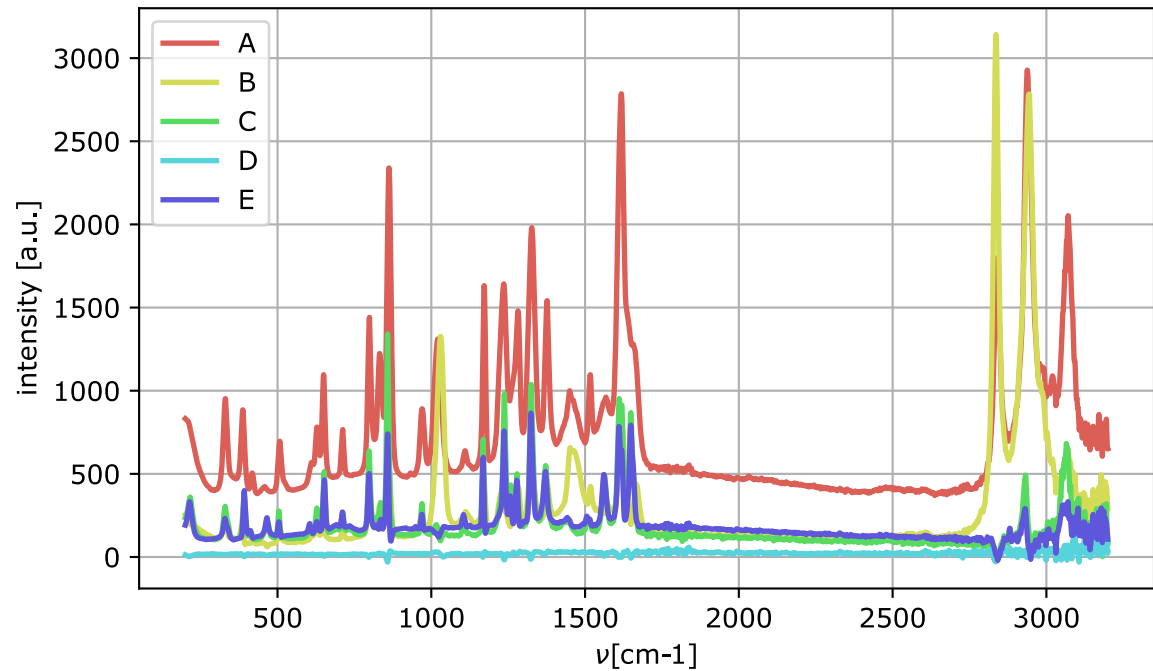

Supplement: s1 [file s1]

# SepFree NMF

Plot  $H$

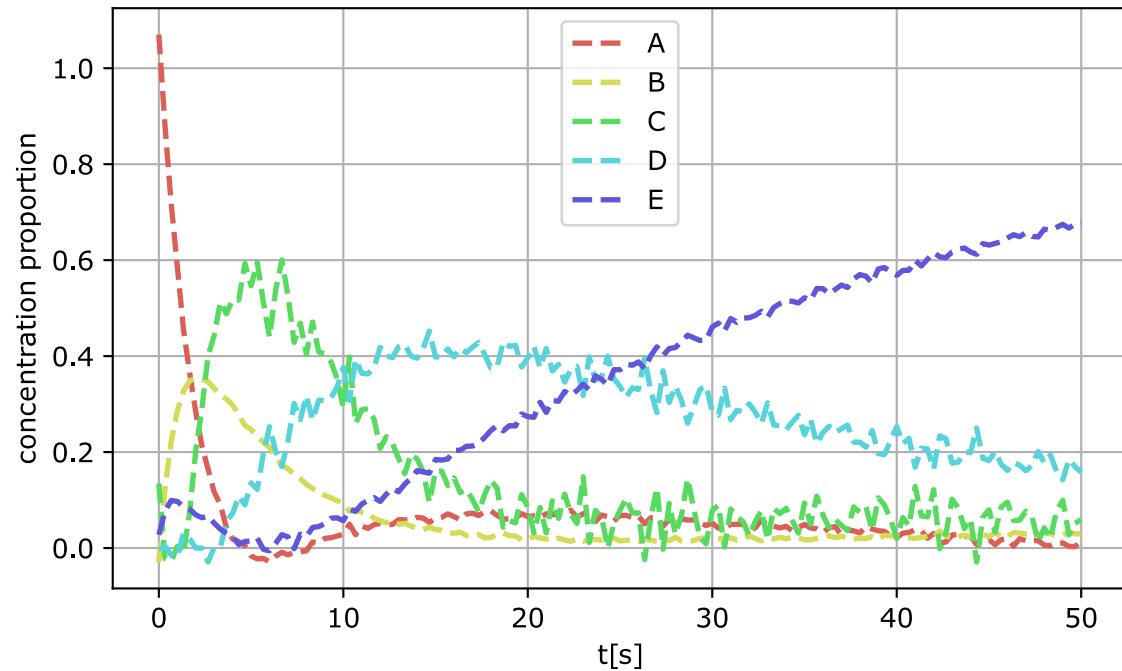

Plot  $W$

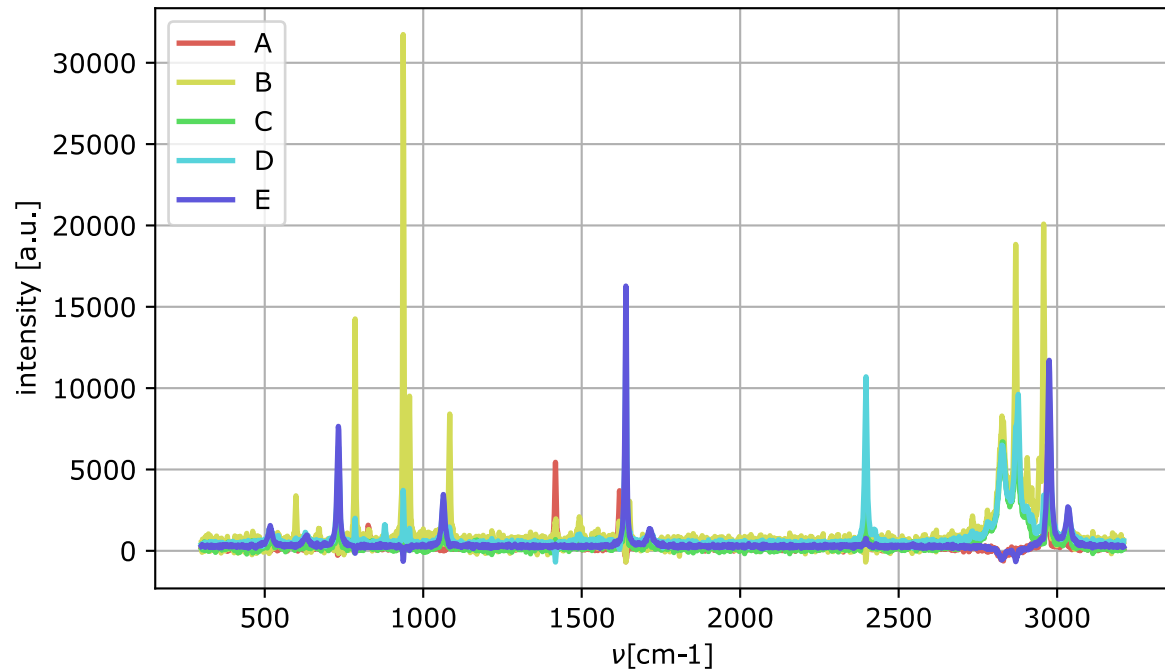

Supplement: s1 [file s1]

# NMF without separability assumption

Plot  $H$

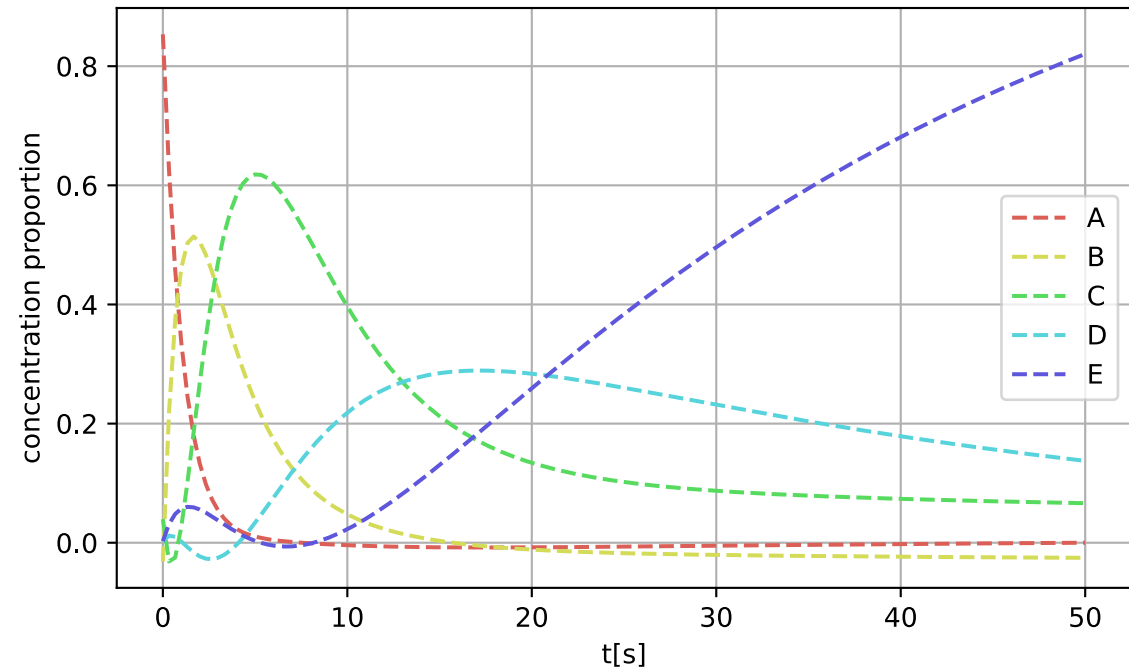

Plot  $W$

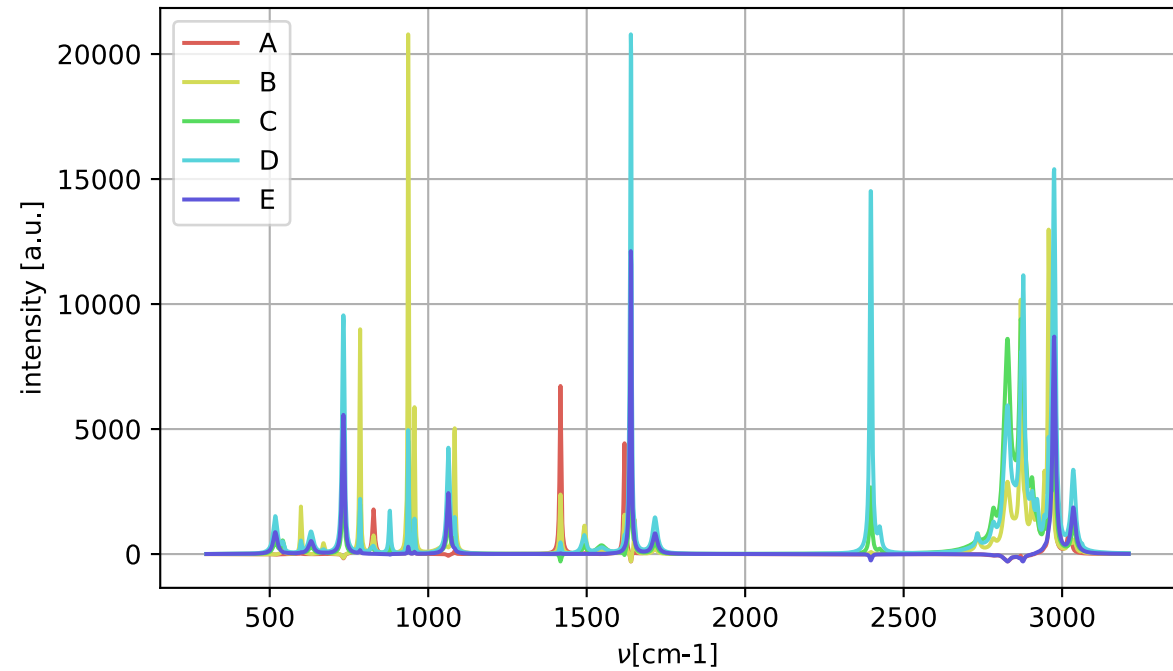

Supplement: s1 [file s1]

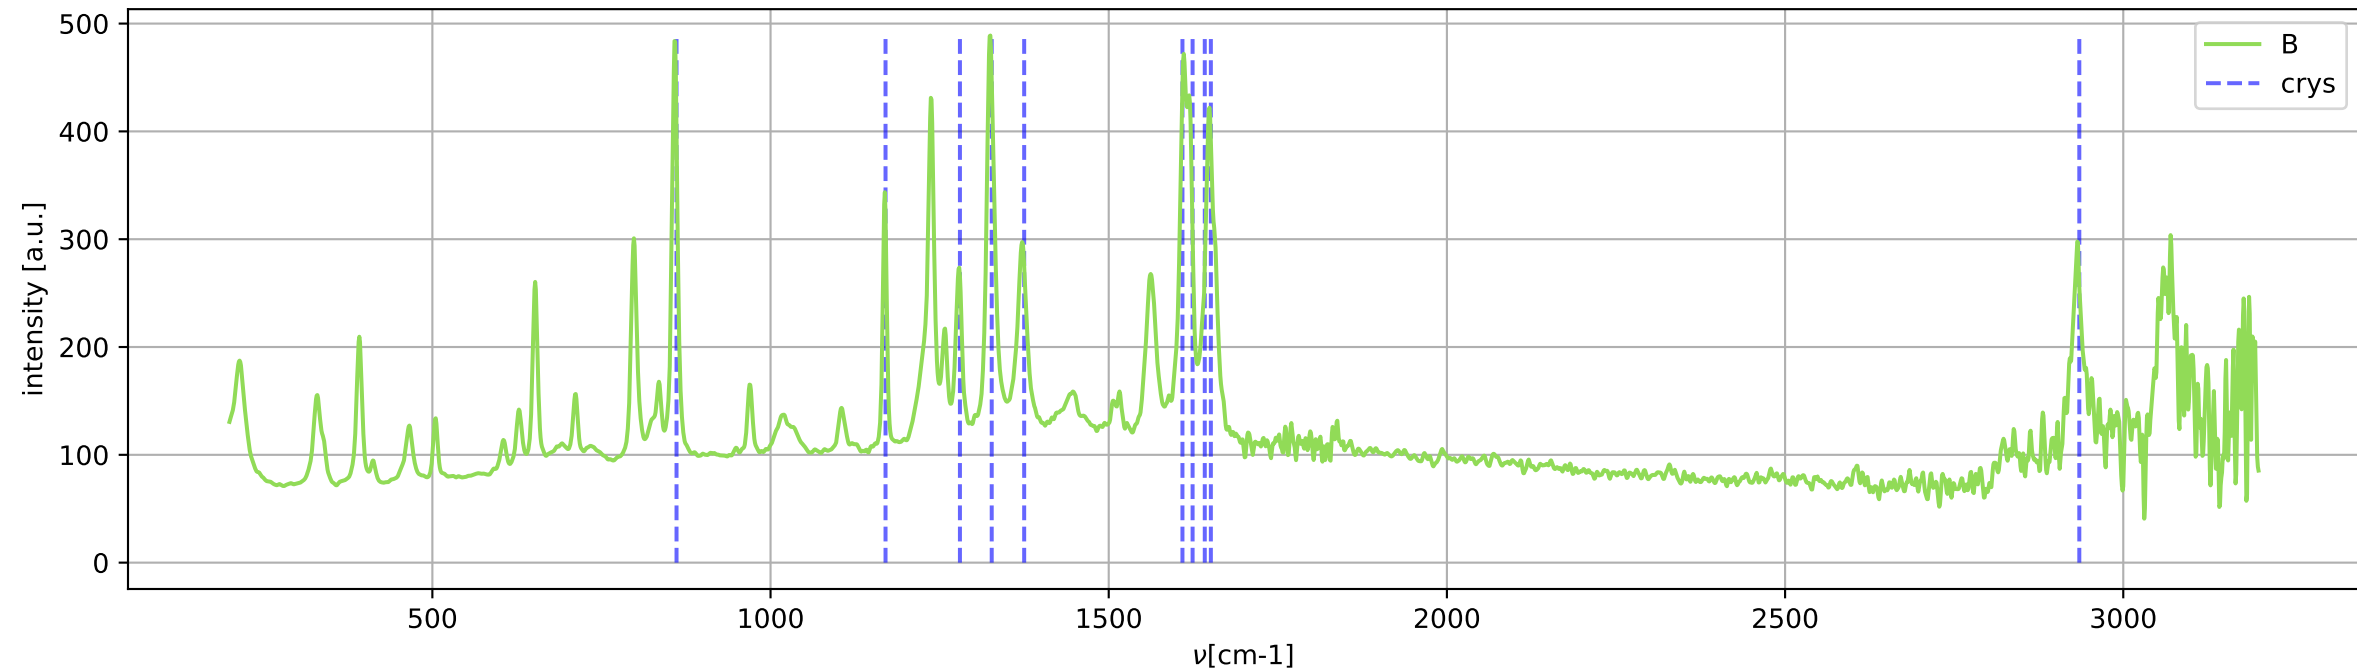

Supplement: s1 [file s1]

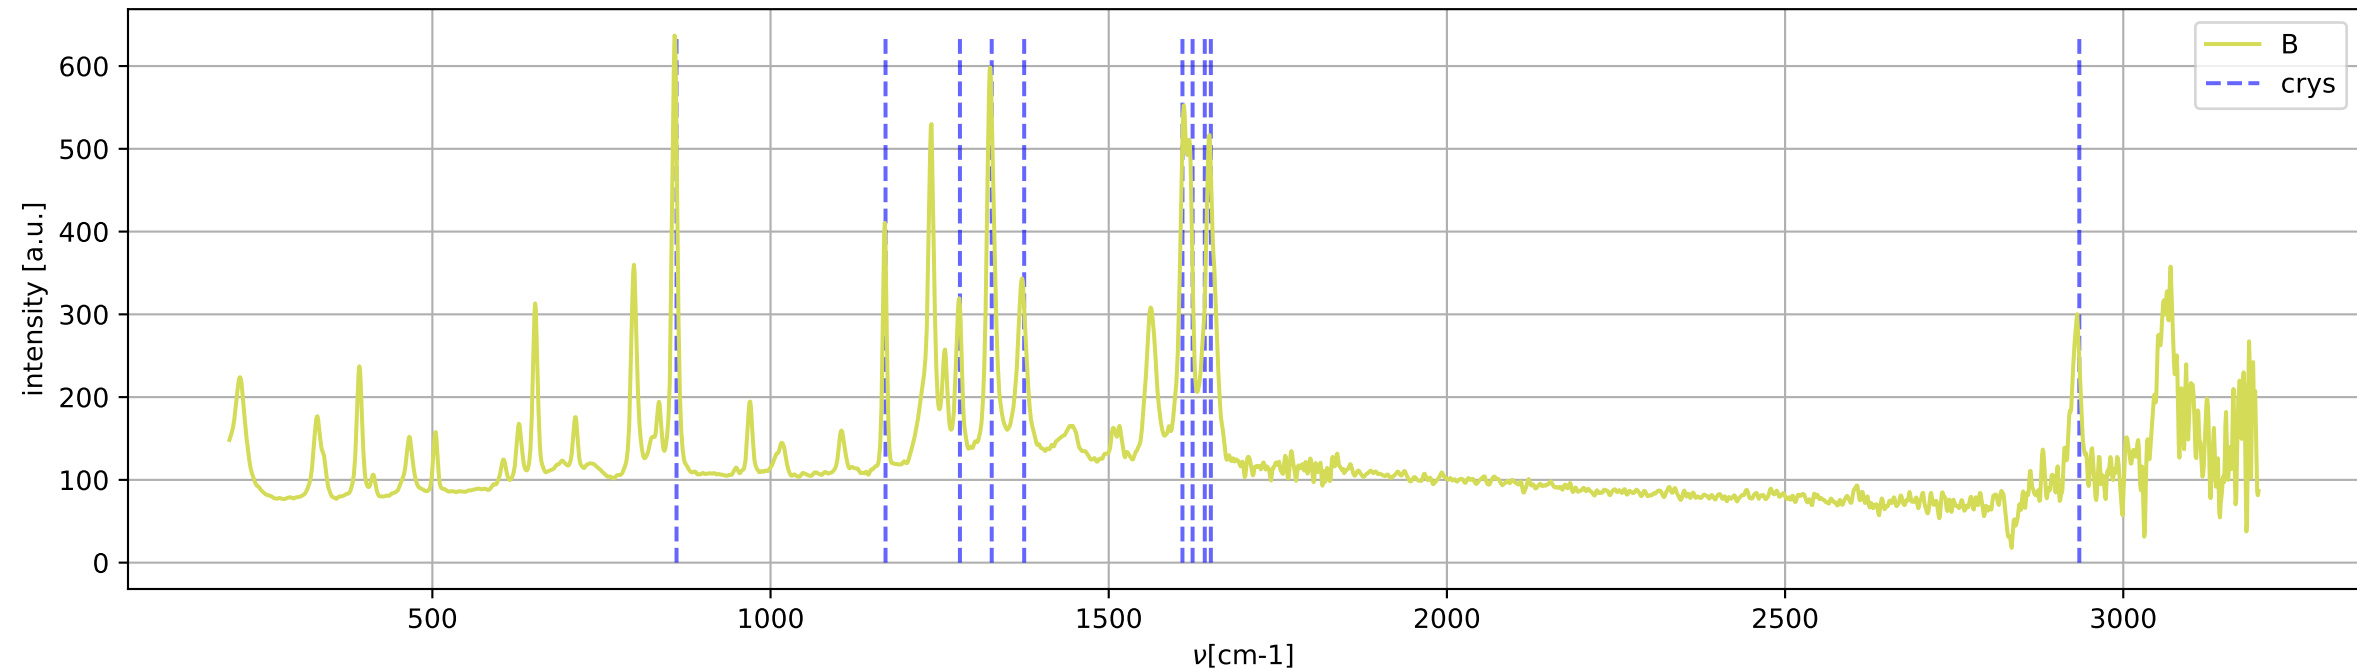

Supplement: s1 [file s1]

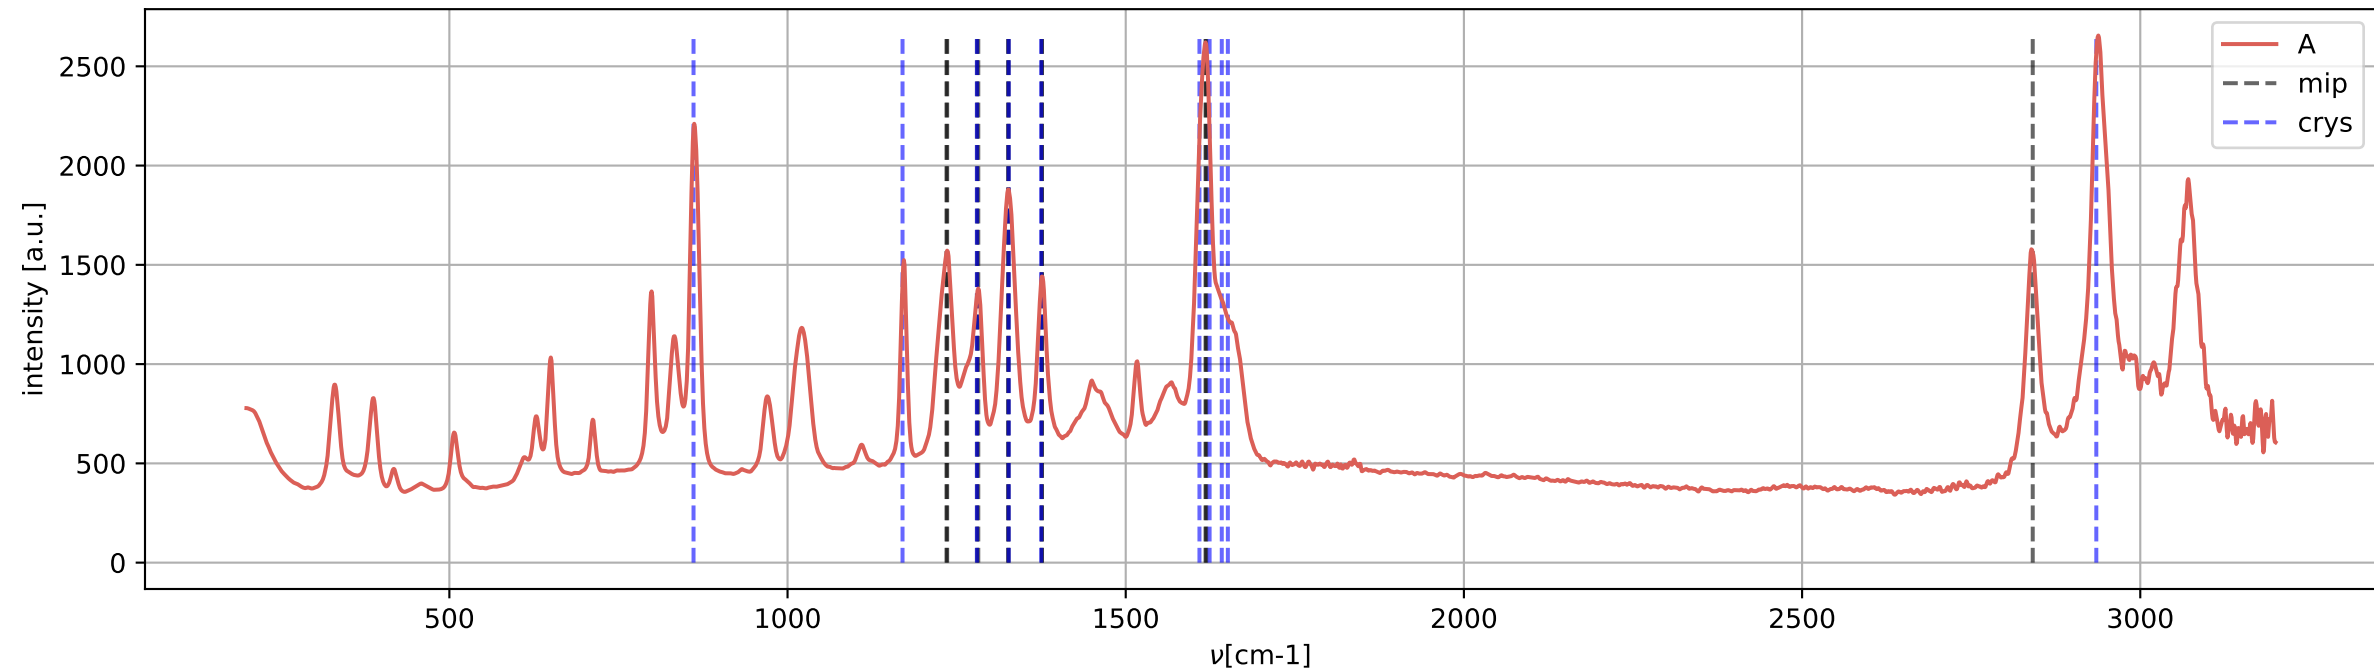

Supplement: s1 [file s1]
